1 *Original Research article*

2

3 ***Streptococcus pneumoniae* rapidly translocates from the**  
4 **nasopharynx through the cribriform plate to invade and**  
5 **inflamm the dura**

6

7 Teerawit Audshasai<sup>1,2</sup>, Jonathan A. Coles.<sup>3</sup>, Stavros Panagiotou<sup>1†</sup>, Shadia Khandaker<sup>1†</sup>,  
8 Hannah E. Scales<sup>3</sup>, Morten Kjos<sup>4</sup>, Murielle Baltazar<sup>1</sup>, Julie Vignau<sup>5</sup>, James M. Brewer<sup>3</sup>, Aras  
9 Kadioglu<sup>1\*¶</sup>, Marie Yang<sup>1\*¶</sup>.

10

11 † **These authors contributed equally to this work.**

12

13

14 **Abstract.** The entry routes and translocation mechanisms of bacterial pathogens into the  
15 central nervous system remain obscure. We report here that *Streptococcus pneumoniae* (Sp)  
16 or polystyrene microspheres, applied to the nose of a mouse, appeared in the meninges of the  
17 dorsal cortex within minutes. Recovery of viable bacteria from dissected tissue and  
18 fluorescence microscopy showed that up to at least 72h, Sp and microspheres were  
19 predominantly in the outer of the two meninges, the pachymeninx. No Sp were found in  
20 blood or cerebrospinal fluid. Evidence that this was not an artifact of the method of  
21 administration is that in mice infected by horizontal transmission, Sp were also  
22 predominantly in the meninges and absent from blood. Intravital imaging through the skull,  
23 and flow cytometry showed recruitment and activation of LysM<sup>+</sup> cells in the dorsal  
24 pachymeninx at 5h and 10h following intranasal infection. Imaging of the cribriform plate  
25 suggested that both Sp and microspheres entered through its foramina via an inward flow of  
26 fluid connecting the nose to the pachymeninx. Our findings bring further insight into the  
27 invasion mechanisms of bacterial pathogens such as Sp into the central nervous system, but  
28 are also pertinent to the delivery of drugs to the brain, and the entry of air-borne particles into  
29 the cranium.

30

31 **Author affiliations:**

32 <sup>1</sup>Institute of Infection and Global Health, University of Liverpool, 8 West Derby  
33 Street, Liverpool L69 7BE, United Kingdom

34 <sup>2</sup> Faculty of Pharmacy, Mahidol University, 447 Sri-Ayuthaya Road, Rajathevi, Bangkok 10400,  
35 Thailand

36 <sup>3</sup> Institute of Infection, Immunity and Inflammation, University of Glasgow, Glasgow G12 8TA,  
37 United Kingdom

38 <sup>4</sup> Faculty of Chemistry, Biotechnology and Food Science, Norwegian University of Life Sciences,  
39 Christian Magnus Falsensvei 18, 1433 Ås, Norway

40 <sup>5</sup> Centre de Recherche en Cancérologie et Immunologie Nantes Angers, Université de Nantes, 8 quai  
41 Moncoussu, 44007 Nantes, France.

42

43

44 \* Co-senior authors. <sup>¶</sup> Correspondence to: Prof Aras Kadioglu (a.kadioglu@liverpool.ac.uk) and Dr  
45 Marie Yang (marie.yang@liverpool.ac.uk)

46

47

48 **Running title:** *Streptococcus pneumoniae* invades the dura.

49

50 **Keywords:** cribriform plate; inflammation; nose-to-meninges translocation, *Streptococcus*  
51 *pneumoniae*.

52

53 **Abbreviations:** BHI= Brain Heart Infusion; CSF= Cerebrospinal Fluid; CSFE=  
54 CarboxyFluorescein Succinimidyl Ester; CNS=Central Nervous System; DC: Dendritic Cell;  
55 CFU=Colony Forming Unit; GFP=Green Fluorescent Protein; FCS= Fetal Calf Serum; IAV=  
56 Influenza A Virus; LSM=Laser Scanning Microscope; N.A.= Numerical Aperture; PBS=  
57 phosphate buffered saline; PFA=paraformaldehyde; SHG=Second Harmonic Generation; Sp=  
58 *Streptococcus pneumoniae*.

59

60

## 61 **Introduction**

62

63 Infectious diseases affecting the central nervous system (CNS) are among the most  
64 devastating illnesses, leading to up to 100% mortality in some cases <sup>1</sup>. A wide array of  
65 infectious agents - of either bacterial, viral, fungal or parasitic origin - can cause infections of  
66 the meningeal or parenchymal compartments <sup>2</sup>. *Streptococcus pneumoniae* (Sp) is a frequent  
67 asymptomatic colonizer of the human nasopharynx <sup>3</sup>, it can spread from there to invade other  
68 tissues including the lungs, blood and the cranium, typically when immunity is weakened <sup>4-6</sup>.  
69 Improved understanding of the mechanisms by which neurotropic pathogens, such as Sp, gain

70 access into the CNS would aid the development of more effective preventative or therapeutic  
71 strategies.

72 Intracranial invasion in humans is not examined until clinical symptoms have developed, so  
73 there is no direct evidence of the route of initial invasion. In mice, where tissues can be  
74 examined at shorter or pre-defined time points, it has been reported that instillation of Sp in  
75 the nasal cavity can lead to invasion of cranial tissues in the absence of bacteraemia. Marra &  
76 Brigham <sup>7</sup> examined homogenized brains of infant rats one hour after nasal instillation and  
77 found colony-forming units (CFUs). Rake <sup>8</sup>, van Ginkel et al., <sup>9</sup> and Hatcher et al. <sup>10</sup> found  
78 that the infection density of brain tissue was greatest in the frontal, olfactory area. This  
79 supports the hypothesis that translocation of bacteria from the nasal cavity to the olfactory  
80 bulb is through the foramina of the cribriform plate of the ethmoid bone which allow passage  
81 of the olfactory nerve bundles <sup>11,12</sup> and, indeed, Rake <sup>8</sup> states that Sp '*appear in the*  
82 *perineural space of the olfactory ..... nerve*'. It has been suggested that the infection and  
83 inflammation are in the inner layers of the meninges, i.e. the leptomeninx, which is composed  
84 of the pia, the subarachnoid space and the arachnoid <sup>4,13,14</sup> (Fig. 1A). When Sp is found in the  
85 cerebrospinal fluid (CSF), this suggests its presence in the subarachnoid space of the  
86 leptomeninx. However, fluid from the outer meningeal layer, the pachymeninx, which  
87 contains the collagenous layers that constitute the dura mater <sup>15,16</sup>, is not normally sampled in  
88 the clinic. For instance, the most common presenting feature of pneumococcal meningitis is  
89 headache <sup>17</sup>, and headache involves inflammation of the pachymeninx. The pachymeninx is  
90 richly innervated and vascularized, and contains lymph vessels, and, at least over the cortical  
91 convexities, is thicker than the leptomeninx <sup>18-22</sup>. Inoculation of Sp into the 'subdural space'  
92 of the pachymeninx is an effective route of infection <sup>15,23,24</sup>. The 'subdural space' is now  
93 thought to be a virtual space within the pachymeninx situated beneath layers of collagen and  
94 above the dural border cells that overlie the arachnoid barrier layer <sup>15,20,21,25,26</sup>. Here we have  
95 distinguished infection of the meninges from that of the brain, and report that, at least at early  
96 times, Sp instilled in the nasal cavity reach the dorsal meninges in the pachymeningeal  
97 compartment rather than the leptomeninx, and induce an immune response there. We also  
98 show that meningeal invasion by Sp without bacteraemia can occur in mice infected through  
99 horizontal transmission. To see if translocation from nasopharynx to meninges depended on  
100 an active biological feature of Sp, we also looked for (and found) translocation of inert  
101 polystyrene microspheres and compared a range of diameters. As well as for microbes,  
102 inward translocation from nose to brain is known to occur for stem cells <sup>27</sup> and for non-  
103 biological particles including neurotherapeutics <sup>28,29</sup> and air-borne particulate pollutants <sup>30</sup>.

104 Our results outline a pathway of entry to the brain that may be common to all of these

105 materials.

106

## 107 **Materials and Methods**

108

### 109 **Ethics statement**

110 All animal experiments were conducted in accordance with the Animals (Scientific  
111 Procedures) Act 1986 and Amendment Regulations 2012 (ASPA 2012), and the care and  
112 maintenance guidelines of the Universities of Liverpool and Glasgow. All animal protocols  
113 were approved by the Local Animal Welfare and Ethics Committees under the UK Home  
114 Office Project Licence PB6DE83DA. In line with the 3Rs principle, the number of animals  
115 was kept to a minimum and all surgery and intravital imaging were done under terminal  
116 anaesthesia.

117

### 118 **Mice**

119 C57/BL6J female mice were obtained from Charles River Laboratories (Kent, UK) at 6-8  
120 weeks old, maintained in an isolator, in a category II animal holding room, and were allowed  
121 to acclimatize for at least 7 days before use. LysM<sup>+</sup> cells were imaged in mice (a kind gift  
122 from Professor Sussan Nourshargh, Queen Mary University of London) in which the eGFP  
123 gene was knocked into the Lysozyme (Lys) M locus so that myelomonocytic cells were  
124 fluorescent, with neutrophils comprising the highest percentage of eGFP<sup>hi</sup> cells<sup>31</sup>. CD11c-  
125 eYFP mice are described in<sup>32</sup>.

126

### 127 **Induction of infection**

128 *S. pneumoniae* (Sp) serotype-2, strain D39 (NCTC 7466), were obtained from the National  
129 Collection of Type Culture, London, UK. Serotype-1 (sequence type 217) was a clinical  
130 isolate obtained from an adult male patient presenting with pneumococcal meningitis,  
131 archived at the Malawi-Liverpool-Wellcome Trust Clinical Research Centre, Blantyre,  
132 Malawi. The lab-adapted reference strain D39 strain was chosen for its value as a well-  
133 characterised benchmark isolate, while Sp serotype 1 was used for its relevance as a high  
134 attack rate strain i.e., very short periods of carriage with a high incidence of invasive disease.  
135 Both D39 and serotype 1 strains used in this study are known to be viable in blood up to at  
136 least 48h when administered intravenously<sup>33,34</sup>. Bacteria were streaked onto blood agar and  
137 grown overnight at 37°C, 5% CO<sub>2</sub>. Sp were identified by presence of a zone of haemolysis  
138 round each colony and a zone of inhibition round an optochin disc<sup>35</sup>. A sweep of colonies  
139 was inoculated into brain heart infusion (BHI) broth (Thermofisher) and grown statically  
140 overnight at 37°C. The next day 750 µl of overnight growth was subcultured into BHI  
141 containing 20% (v/v) fetal calf serum (FCS) and grown statically for 4–6 hr until mid-log

142 phase growth (OD<sub>500</sub> 0.8), at which point the broth was divided into 500µl aliquots and  
143 stored at -80°C in BHI broth with FCS for no more than 1 month until use. Before use, two  
144 stock aliquots were thawed at room temperature, serially diluted from 10<sup>-1</sup> to 10<sup>-6</sup> and plated  
145 onto blood agar plates<sup>36</sup> to quantify colony forming units (CFUs).

146 Mice were anesthetized with 2.5% isoflurane in oxygen and a total of 10 µl of a  
147 suspension of Sp in sterile PBS was instilled over 5 - 8 s into the two nares using a  
148 micropipette. The mouse was returned to its cage and allowed to recover from anaesthesia. At  
149 the chosen time-point it was euthanized in a CO<sub>2</sub> chamber and tissue dissected as described  
150 below. In the horizontal transmission experiments only: three mice of a group of five were  
151 infected by Sp, serotype 1, sequence type 217 at a dose of 10<sup>5</sup> CFU/mouse and returned to  
152 their cage. Three days later, all mice were infected intranasally with Influenza virus (IAV)  
153 strain A/HKx31 (H3N2) (4x 10<sup>4</sup> PFU/mouse). IAV is known to promote the rate of  
154 pneumococcal transmission (Kono et al., 2016). Tissues were examined for CFUs after a  
155 further 3, 4, 5 or 6 days.

156 In the high-dose intranasal instillation and flow cytometry immunophenotyping study,  
157 10 µl of a suspension containing approximately 10<sup>8</sup> CFUs of Sp serotype-2 strain D39 was  
158 applied in the nostrils and the mice killed with CO<sub>2</sub> at times comprised between 15 min and  
159 72h. In these sets of experiments, IAV was not administered to any of the mice. After each  
160 experimental infection, health checks were performed at least 3 times a day on the infected  
161 animals: no visible signs of disease symptoms nor significant changes in motor activity were  
162 observed. To determine the viable counts (CFUs) at the shortest time point possible, a group  
163 of infected mice were killed by cervical dislocation immediately after recovery from  
164 anaesthesia. The interval between the end of the nasal instillation and cardiac arrest was  
165 about 2 min 10s. The tissue samples were dissected out 5-7 min later.

166

167

#### 168 **Tissue collection for determination of CFUs**

169 At least 100 µl of blood was taken by cardiac puncture, and 2-5 µl of CSF was collected from  
170 the cisterna magna. Four different tissues were taken from each brain and immersed in 1.0 ml  
171 of sterile PBS. These were: (1) the dorsal skull, excised with its adhering tissue - the cleavage  
172 plane is probably within the inner layers of the pachymeninx<sup>15</sup>, so some pachymeningeal  
173 tissue may have been excluded. This tissue sample is called “skull/ pachymeninx” in Fig. 1.  
174 (2) A layer of superficial tissue was sliced off from the dorsal cortex: these samples included  
175 the leptomeninx and probably inner layers of the pachymeninx, as well as parenchymal tissue  
176 (‘cortex/leptomeninx’). (3) The entire olfactory bulb, and (4) the skull bone overlying the

177 olfactory bulb, with its adherent meningeal tissue, labeled ‘skull/olfactory bulb’. The nasal  
178 cavity was exposed by removing the palate, and the nasal septum and associated nasal  
179 mucosa were harvested: ‘nasopharynx’. Tissue samples were homogenised using a T10 basic  
180 Ultra-Turrax<sup>®</sup> homogeniser (IKA, Staufen, Germany) running at 30,000 rpm for 6-8 sec at  
181 room temperature. 100 µl of the homogenate was transferred to a well on a 96-well plate and  
182 ten-fold serial dilutions made in sterile PBS. 60 µl aliquots were spotted on blood agar plates  
183 containing 10µg/ml gentamicin. Cerebrospinal fluid (CSF) samples were plated neat.  
184 Colonies were counted manually after overnight incubation under anaerobic conditions. To  
185 compare densities of CFUs in pachymeningeal tissue scraped from the skull and (cortex +  
186 leptomeninx) samples, one volume of lysis buffer (125mM Tris pH 6.8; 5mM EDTA; 1%  
187 SDS; 10% glycerol) was added to one volume of undiluted homogenate, and protein content  
188 was assayed using a Pierce BCA Protein Assay Kit (Thermofisher) according to the  
189 manufacturer’s instructions.

190

### 191 **Fluorescence labeling of *Streptococcus pneumoniae* with CFSE**

192 Sp serotype 2, strain D39 were fluorescence labelled according to a previously described  
193 protocol<sup>37</sup>. After growth to 0.5 OD<sub>600</sub> in BHI growth medium at 37°C anaerobically, one ml  
194 of the suspension was transferred to a 1.5 ml tube and centrifuged at 4,000g for 5 minutes.  
195 The supernatant was discarded and the pellet resuspended in 1 ml of BHI containing 10 µM  
196 5(6)-carboxyfluorescein diacetate N-succinimidyl ester (CFDA-SE, Sigma #21888). The  
197 suspension was incubated on a rotating shaker at 37°C and 200 rpm for 45 minutes, in the  
198 dark, centrifuged at 12,000g for 3 minutes and washed 3x with room-temperature PBS. The  
199 bacteria were resuspended at 10<sup>8</sup> CFUs/10 µl and stored on ice.

200

### 201 **Post-mortem imaging of the meninges**

202 After the mouse was euthanized, the brain and meninges were perfused through the right  
203 cardiac ventricle with either 50 ml PBS or with DiI-glucose solution according to a  
204 previously described protocol<sup>38</sup>, followed by 50 ml of 4% (wt/vol) paraformaldehyde (PFA)  
205 solution, at 1.4 ml/min. The lower jaw and the scalp were removed to expose the dorsal and  
206 olfactory bulb areas of the skull. Either the underlying soft tissue was left attached and  
207 imaged through the skull, or the brain parenchyma and the leptomeninx were removed to  
208 leave pachymeningeal tissue which was imaged from the internal face<sup>39</sup>. The pieces of skull  
209 were mounted on a Petri-dish and imaged immediately. Z-stack images were obtained with a  
210 Zeiss LSM 880 two-photon microscope with femtosecond excitation at 840 nm with a x10,  
211 N.A. 0.3 air or a x20, N.A. 1.0 water immersion objective. CFSE was detected at 500-550

212 nm, Nile red at 570-620 nm. Image stacks were made at 880 nm excitation wavelength and  
213 comprised between 70-240 images with areas up to 425  $\mu\text{m}$   $\times$  425  $\mu\text{m}$  and depths 250-500  
214  $\mu\text{m}$ .

215

#### 216 **Baclight™ Red-staining and LYVE-1 immunostaining of the skull whole mount.**

217 Pneumococci were stained using BacLight™ Red stain (Thermo Fisher), a general  
218 cytoplasmic stain<sup>40</sup> following the manufacturer's instructions i.e., 1  $\mu\text{L}$  of a 100  $\mu\text{M}$  DMSO  
219 working solution of the BacLight™ Red bacterial stain was added to 1 mL of bacterial  
220 suspension grown to mid-log phase, followed by 2 washes in PBS (0.1M, pH 7.4) and  
221 resuspended in 100 $\mu\text{L}$  of PBS. 10 $\mu\text{L}$ /mouse of the BacLight™ Red-stained Sp suspension  
222 was administered intranasally. At 15 min post-administration, mice were sacrificed by CO<sub>2</sub>  
223 asphyxia and perfused with heparin-supplemented PBS solution, followed by 4%  
224 paraformaldehyde. The dorsal skull was carefully detached from the brain and trimmed to an  
225 area comprising the parietal and frontal bones together with attached meningeal tissue. The  
226 resulting tissue was stained using anti-mouse LYVE-1 monoclonal antibody (Thermo Fisher,  
227 ALY7-eFluor 450) diluted at 1:200 in PBS, and mounted in a Petri dish for subsequent  
228 imaging. The mounted sample was imaged with a Zeiss LSM 880 confocal microscope with  
229 excitation set at 561 nm (for Baclight™Red) and 405 nm (for LYVE-1). Images were  
230 acquired through a x10, N.A. 0.3 air immersion objective. Baclight™ Red was detected at  
231 571-664 nm while LYVE-1-eFluor 450 was detected at 416-538 nm.

232

233

#### 234 **Intravital two-photon microscopy through the thinned skull**

235 The microscope and methods were essentially as previously described<sup>20</sup>. Briefly, the mouse  
236 was maintained under isoflurane anaesthesia, adjusted as necessary to suppress the  
237 withdrawal reflex, and core temperature was maintained at 37°C with a heating mat. The  
238 dorsal skull was exposed and a steel plate with a hole 5 mm in diameter was glued to the  
239 skull, usually with its centre about 2 mm caudad to bregma and 2 mm lateral, and held in  
240 clamps. In some cases, the mouse was injected through a tail vein with a blood marker such  
241 as 70 kD dextran-rhodamine and also furamidine, a nuclear dye which extravasates in the  
242 pachymeninx<sup>41,42</sup>. The skull within the hole in the plate was superfused with Tris buffered  
243 saline and thinned with a dental drill. The mouse with attached plumbing was transferred to  
244 the stage of an upright two-photon microscope (Zeiss LSM7 MP) controlled by Zen software.  
245 The excitation source was a tunable femtosecond laser (Coherent Chameleon Ultra II). This  
246 was either used at a wavelength of up to 950 nm or set at up to 880 nm and used to drive an



247 optical parametric oscillator (Coherent) which gave a second beam, typically set at 1140 nm  
248 (for mKate). Images were acquired through a x20, N.A. 1.0 water immersion objective (W  
249 Plan-Apochromat, Zeiss). Five detector channels were available to separate emission from  
250 different fluorophores and from second harmonic generation from bone and collagen. To  
251 follow leucocyte movement, Z-stacks about 30  $\mu\text{m}$  deep were collected at intervals of about  
252 30s.

253

#### 254 **Image analysis**

255 Two-photon z-stacks and videos were analysed with Imaris 9.5 (Bitplane) and Fiji (NIH  
256 Image) software packages. To separate neutrophils from other, less bright, cells in LysM+  
257 eGFP mice, each movie was normalized to the same mean brightness and contrast was set  
258 manually against images obtained from an uninfected mouse. Cells were further selected for  
259 XY diameters 12  $\mu\text{m}$  or greater and identified as neutrophils. The approximate mean speeds  
260 were calculated from their positions in sequential 30  $\mu\text{m}$  z-stacks obtained at the minimum  
261 repetition interval, typically 30s. The number of LysM<sup>+</sup> within each z-stack were quantified  
262 using the 'spots' function. Values were then converted to the number of cells per  $\text{mm}^2$   
263 according to the size of the imaging area. In order to enhance signal inside the region of  
264 interest (below the skull), the surface rendering of the skull as visualised by the SHG was  
265 generated and any signal found above this generated surface (outside the skull), was set to 0.  
266 To measure the distances from the skull to fluorescent Sp (or microspheres) in the 3D  
267 reconstructions, the distance measurement function of Imaris was used to calculate the  
268 shortest distance from the center of the positive signal to the surface rendering of the skull.

269

#### 270 **Flow cytometric analysis**

271 Groups of C57BL/6J female mice ( $n = 5/\text{time point}$ ) were infected with *S. pneumoniae* D39,  
272 and euthanized at post-infection times ranging from 1h to 18h. Pachymeningeal tissue was  
273 scraped from the calvaria, gently crushed and passed through a cell strainer to produce a  
274 single cell suspension in Dulbecco's phosphate-buffered saline (Thermofisher). Cells were  
275 counted and stained with anti-mouse antibodies to CD45 (clone 30-F11, BD Biosciences),  
276 CD4 (clone RM4-5, Biolegend), CD11b (clone M1/70, eBioscience), CD11c (clone N418,  
277 eBioscience) and LySM D1 (clone G3, Santa Cruz Biotechnology,) or Ly6G (clone 1A8,  
278 Biolegend), in the presence of anti-CD16/32 Fc-receptors block (BD Biosciences). Events  
279 were acquired using a FACS Canto II (BD Biosciences) flow cytometer (Supplementary Fig.  
280 S4).

281

## 282 **Intranasal administration of microspheres**

283 Fluorescent polystyrene microspheres of three nominal diameters were used: yellow-green  
284 (505/515 nm, Thermofisher F13081,  $4 \times 10^{10}$  microspheres/ml) and Nile Red (Thermofisher  
285 F8819,  $4 \times 10^{10}$  microspheres/ml) nominally 1  $\mu\text{m}$  with carboxylate modified surface, Nile  
286 Red nominally 5  $\mu\text{m}$  (5-7.9  $\mu\text{m}$ ) (Spherotech, FP-6056-2,  $1.5 \times 10^8$ /ml) and Nile Red  
287 nominally 10  $\mu\text{m}$  (10-14  $\mu\text{m}$ ) (Spherotech, FH-10056-2,  $10^7$  microspheres/ml) with  
288 unmodified surfaces. For imaging and flow cytometry on meningeal tissue, suspensions  
289 containing approximately  $10^7$  microspheres per ml were prepared and a volume of 10 $\mu\text{l}$   
290 (containing  $10^5$  microspheres) was applied intranasally to each of five mice for each diameter  
291 and the mice were culled by CO<sub>2</sub> asphyxia 30 min later. In experiments designed label the  
292 leptomeninx, microspheres were injected in the cisterna magna using a 34G 10 $\mu\text{l}$   
293 microsyringe (Hamilton). All of these experiments involving microspheres were conducted  
294 without any prior or subsequent co-infection with either Sp or IAV.

295 Two-photon imaging was done through the skull and into the meninges in the areas  
296 of the olfactory bulb and the dorsal cortex, or from the intracranial face of the skull with its  
297 attached pachymeningeal tissue. Excitation was at 840 nm which produced two-photon  
298 excitation of the fluorophores and second harmonic generation (SHG, in blue). For flow  
299 cytometry, pachymeningeal tissue scraped from the dorsal was collected in PBS and passed  
300 through a cell strainer. A BD Canto II flow cytometer detected the YFP- and Nile red-  
301 labelled microspheres using the FITC and PerCP Cy5.5 channels, respectively.

302

## 303 **Statistical analysis**

304 For comparison of multiple groups, the statistical significance of endpoints was evaluated by  
305 one-way ANOVA followed by Tukey's multiple comparisons *post hoc* test. For comparison  
306 of two groups, the unpaired two-tailed Student's *t* test was used. Data are presented as means  
307  $\pm$  SEM in bar graphs. Statistical significance was reported as \*,  $P < 0.05$ ), \*\*,  $P < 0.01$ ), \*\*\*,  
308  $P < 0.001$ ; \*\*\*\*,  $P < 0.0001$ ). All statistical analyses were performed with Prism software  
309 (version 8.0, GraphPad Software).

310

## 311 **Results**

312

### 313 **Translocation of pneumococci following horizontal transmission.**

314 To examine the dissemination of Sp in mice through horizontal transmission, infected (index)  
315 mice and uninfected (contact) mice were housed together. A suspension of Sp, serotype-1,  
316 sequence type 217, was applied to the nares of three index mice (adult C57/BL6J) in a cage  
317 of five (Fig. 1B). Three days later, influenza A virus (IAV) was applied to the nares of all  
318 five mice. It is known that, at least in infant mice, the inflammation caused by IAV facilitates  
319 dissemination of Sp away from the nasopharynx to other tissues<sup>43</sup> and increases shedding via  
320 nasal secretion<sup>43-46</sup>. Four different groups of mice i.e., 5 mice per time point i.e., 3 index and  
321 2 contact mice, were euthanized on days 6 - 9 (Fig. 1B) and blood and tissues analyzed for  
322 colony forming units (CFUs). The pooled results for the twelve index mice and eight contact  
323 mice are shown in Fig. 1C. All the index mice showed colonization of the nasopharynx, and  
324 so did five of the eight contact mice, a transmission rate of 62.5% (Fig. 1C1). Dissemination  
325 in the cranium was examined in four tissue samples for each mouse: the dorsal skull bone and  
326 the soft tissue that remained attached to it when it was separated from the brain, the  
327 superficial cortex underlying this with its attached meningeal tissue, the frontal skull  
328 overlying the olfactory bulb and attached tissue, and the olfactory bulb with attached  
329 meningeal tissue (Fig. 1A). Pneumococci were found, in one or more mice, in all of these  
330 four tissue selections (Fig. 1C 2-5). Since mechanical separation of skull from brain appears  
331 to split the meninges at the inner layers of the pachymeninx<sup>15,47</sup>, the “pachymeninx” samples  
332 probably included most of the pachymeninx while the meninges attached to the brain tissue  
333 were the leptomeninx, probably contaminated with some pachymeningeal tissue. Viable  
334 pneumococci were found in the lung tissue of one contact mouse as well as three index mice  
335 (Fig.1C7), but in neither index nor contact mice were CFUs obtained from blood (Fig. 1C6).  
336 In other experiments, in which IAV was not administered, horizontal transmission still  
337 occurred but at a lower transmission rate and no viable pneumococci were found in the  
338 meninges (Supplementary Fig. S1). In transmission experiments similar to those presented  
339 here but using infant mice and bioluminescent Sp, Diavatopoulos et al.<sup>43</sup> detected  
340 luminescence *in vivo* from the lungs but not from within the cranium. A possible explanation  
341 of the difference is that since the meninges are very thin, the total numbers of bacteria they  
342 contain are small relative to bulky tissues such as the lungs, and therefore would be difficult  
343 to detect by *in vivo* bioluminescence. To our knowledge, this is the first report that upon  
344 horizontal transmission, pneumococci can translocate from the nasopharynx to the cranium of  
345 mice without bacteraemia.

346

347 **Translocation of pneumococci following direct nasal application.**

348 The horizontal transmission model came with the challenging task of determining the precise  
349 timing and anatomical route of infection. Hence in order to better characterize the  
350 nasopharynx-to-meninges translocation and its time course, we had recourse to intranasal  
351 instillation, a widely used procedure for studying the entry of pathogens into the central  
352 nervous system. We infected mice at a defined time by applying a suspension of Sp to the  
353 nares (without co-infection with IAV). The same tissues as those analyzed in the horizontal  
354 transmission model were collected over a period of up to 72h (Fig 1D 1-6). All the mice  
355 showed localized infections, in, at least, the nasopharynx, but at no time point was  
356 bacteraemia detected, nor were CFUs found in cerebrospinal fluid (CSF) samples recovered  
357 from the cisterna magna, or in lung tissue (Fig. 1D6). At the earliest time point, when the  
358 mouse was killed about 2 min after nasal application and the tissue dissected immediately,  
359 CFUs were found not only in the nasopharynx (Fig. 1D1) but also in the olfactory bulb and  
360 attached meninges (Fig.1D2). Since the translocation from nasopharynx to cranium is so fast  
361 (minutes), it is unlikely that it involves damage to cells of the nasopharynx. Apart from the  
362 fact that there was no detectable release of pneumococci to the blood, a number of studies  
363 have indeed shown that pneumococci cause detectable damage to cells only after several  
364 hours of exposure<sup>33,48-55</sup>. Surprisingly, CFUs were also recovered at this earliest time point  
365 from the more remote tissue associated with the dorsal skull and cortex. In all these tissues,  
366 the numbers of CFUs then fell by about two log units to reach a minimum at the 30 min time  
367 point, even, in the skull/pachymeninx sample, becoming undetectable. The numbers of CFUs  
368 then increased with a doubling time of less than 20 min to reach a peak at 5-10h, before  
369 falling again. CFU counts then declined gradually over time, but persisted up to 14 days post-  
370 infection, including in the brain and leptomeninx (Supplementary Fig. S2). This time course  
371 (Fig. 1D) is different from that reported by Dommaschk et al.<sup>56</sup>, who found a monotonic  
372 decrease over 28 days. However, in that study, the initial measurement was not done until 1 h  
373 after nasal instillation and they used a different strain of Sp (serotype 3, A661).

374

375 **After translocating from the nasopharynx to the dorsal meninges, pneumococci are**  
376 **predominantly found in the pachymeninx but outside lymph vessels.**

377 To quantify the density of viable Sp in the pachymeningeal tissue adhering to the skull, the  
378 soft tissue was scraped from the skull and the number of CFUs expressed per mg protein  
379 content. This was compared with the density in the superficial cortex and attached  
380 leptomeninx. At 10h post-infection, in the five of eight mice that presented CFUs, the mean

381 number in the pachymeningeal tissue was 276 times (SD=162,  $p = 0.019$ ) that found in the  
382 cortex samples (Fig. 2A). This shows that Sp were far more concentrated in the pachymeninx  
383 than in the superficial cortex and attached meninges. Indeed, if the separation occurred in the  
384 inner layers of the pachymeninx, it is possible that all the intracranial CFUs in these mice  
385 were in the pachymeninx, the CFUs in the ‘cortex’ samples coming from contaminating  
386 remnants of the inner pachymeninx.

387 To obtain further information on the location of intracranial Sp, we used two-photon  
388 microscopy and fluorescent Sp. In the first method, Sp were labeled in culture by uptake of  
389 carboxyfluorescein succinimidyl ester (CFSE) (Supplementary Fig. S3A) and applied to the  
390 nose. Thirty minutes later, the mouse was killed with CO<sub>2</sub>, the brain removed, and a piece of  
391 dorsal skull bone with adherent tissue imaged from the intracranial side<sup>39</sup>. With femtosecond  
392 excitation at 840 nm, sparse particles emitting green fluorescence were visible (Fig. 2 B);  
393 these were in about the same plane as the collagen fibres of the dura made visible by second  
394 harmonic generation (SHG)<sup>41</sup>. Green particles were not seen in uninfected (i.e. naïve) mice  
395 (Fig. 2 C). To see if the distribution of Sp extended deeper under the skull than the  
396 pachymeninx, CFSE-labeled Sp were also imaged through the skull into the intact meninges  
397 and superficial parenchyma. To provide anatomical markers, blood vessels were labeled by  
398 intravenous infusion of the carbocyanine dye DiI<sup>38</sup>. Again, fluorescent particles were  
399 observed in tissue from infected mice (Fig. 2 D) but not uninfected ones (Fig. 2 E). In 3D  
400 reconstructions, it was evident that the green particles in infected mice were close to the skull  
401 and above the pial blood vessels (Fig. 2 F,G). Although endogenous fluorescent particles can  
402 often be seen with two-photon microscopy, their detection requires a higher excitation  
403 intensity and detector sensitivity than those used here. Nevertheless, to check that the CSFE-  
404 labeled Sp were not confused with endogenous fluorescent objects, we also used Sp with very  
405 different excitation and emission spectra. Mice were infected with Sp expressing the red  
406 fluorescent protein mKate2<sup>57</sup>. Ten hours later, the dorsal meninges and superficial cortex  
407 were imaged *in vivo* through the skull using two-photon excitation at 1140 nm. Red particles  
408 were observed close below the green SHG of the skull of infected mice (Fig. 2 H) but not in  
409 uninfected mice (Fig. 2 I).

410 To examine the location of pneumococci in relation to dural lymph vessels, we have used yet  
411 another label to stain pneumococci (BacLight™ Red, ThermoFisher<sup>40,58</sup>) which appear as  
412 dots in the meninges of infected mice (Fig 2J-K, Supplementary Fig. S3B), while none were  
413 found in uninfected mice (Fig. 2L,M). Our results clearly show that pneumococci that reach  
414 the pachymeninx from the nasopharynx are located outside, not inside, LYVE-1+ structures.  
415 Since the meningeal lymph vessels are in the pachymeninx<sup>59-61</sup>, the presence of a LYVE-1

416 signal close to the BacLight™Red-labelled pneumococci is further evidence that Sp are in the  
417 pachymeninx.

418 We next sought to determine the distance from the skull of the fluorescent signals. The mean  
419 measured distance of Sp (CFSE- and mKate2-labelled) was 18.2  $\mu\text{m}$ , SD 13.6  $\mu\text{m}$ , N = 120  
420 particles measured in 4 z-stacks and 4 mice (Fig. 3D, Sp black circles). Although the large  
421 blood vessels in the pachymeninx and in the leptomeninx make the thicknesses of both layers  
422 very variable <sup>20</sup>, the distribution of depths suggests that most pneumococci were in the  
423 pachymeninx, and certainly not within the brain parenchyma. As expected, Sp labelled by  
424 uptake of CFSE lost fluorescence as the dye was diluted in successive generations <sup>62</sup>. On  
425 some occasions, expression of mKate2 was also lost but we found that robustly fluorescent  
426 polystyrene microspheres of diameter 1  $\mu\text{m}$  were also transported from the nasopharynx to  
427 the meninges so we used these as a tentative surrogate for Sp. It is known that Sp and  
428 molecules infused in the mouse cisterna magna are carried by CSF to spaces in the  
429 leptomeninx <sup>20,63,64</sup>. Hence to make another test of whether particles entering from the  
430 nasopharynx were arriving in this space or in the pachymeninx, we applied green fluorescent  
431 microspheres to the nose and infused red fluorescent microspheres into the cisterna magna of  
432 the same mouse. 30 min later the mouse was euthanized and the meninges and cortex were  
433 examined through the skull with two-photon microscopy (Fig. 3A-C). The microspheres  
434 administered intranasally were found at a mean distance from the skull of 24.2  $\mu\text{m}$ , SD 13.6  
435  $\mu\text{m}$ , N = 90 particles measured in 4 z-stacks in 4 mice, which is not significantly different  
436 from that of the bacteria (Fig. 3D). The mean depth of those infused in the cisterna magna  
437 was 81.0  $\mu\text{m}$ , SD 15.9  $\mu\text{m}$ , N =6 particles measured in 3 z-stacks in 3 mice, which is more  
438 than three times greater (Fig. 3D). Altogether, the various techniques we used concur in  
439 showing rapid translocation from the nasopharynx to the pachymeninx of the dorsal  
440 meninges.

441

442

#### 443 **Nasal administration of pneumococci causes recruitment of innate immune cells to the** 444 **dorsal pachymeninx.**

445 In extracranial tissues such as lung and spleen, Sp and neutrophils interact vigorously <sup>65-68</sup>. To  
446 see how neutrophils reacted to arrival of Sp in the dorsal meninges and superficial cortex, we  
447 imaged them *in vivo* by intravital two-photon microscopy through the thinned skull of mice  
448 expressing eGFP under control of the LysM promoter (Fig. 4 A-D). In addition to  
449 neutrophils, LysM is expressed in other cells of the myelomonocytic lineage, but in  
450 *LysM<sup>GFP/GFP</sup>* mice, neutrophils are the brightest <sup>31</sup> and can be distinguished from



451 macrophages<sup>66,69</sup>. In agreement with others, we found very few LysM<sup>+</sup> cells in uninfected  
452 mice<sup>69-72</sup> (Fig. 4D,E), confirming that the skull-thinning and two-photon imaging did not  
453 recruit myelomonocytic cells to the meninges within the duration of the experiment<sup>71</sup>. After  
454 nasal infection with pneumococci, the number of LysM<sup>+</sup> cells in the dorsal meninges was  
455 increased at 5h and 10h (Fig. 4 E). Nearly all of them were in a layer close under the skull, in  
456 the plane of smaller vessels typical of the pachymeninx<sup>73,74</sup> (Fig. 4 C, D), and above the pia  
457 and parenchyma (Fig. 4 A, B) where the microglia are present<sup>75</sup>. Analysis of videos  
458 (Supplementary Videos 1, 2) showed that motile LysM<sup>+</sup> cells moved at progressively higher  
459 mean speeds as infection progressed (Fig. 4 F) (see also z-projections of tracks in Fig. 4 C  
460 and D). The mean speed of motile LysM<sup>+</sup> cells at 10h post-infection was  $10.4 \pm 0.4 \mu\text{m}/\text{min}$ ,  
461 which is close to the  $9.7 \mu\text{m}/\text{min}$  found by Kreisel et al.<sup>66</sup> for neutrophils in mouse lung.  
462 Many LysM<sup>+</sup> cells in the pachymeninx followed generally directed trajectories, some along  
463 the outsides of blood vessels (Fig. 4 C, Supplementary Video 2) rather than making random  
464 walks<sup>66</sup>. The averaged x, y, and z components of the velocities were not significantly  
465 different from zero, i.e., no global drift was detected.

466 To determine the changes in numbers of LysM<sup>+</sup> cells in the dorsal pachymeninx over  
467 a wider range of times (0 to 18h) we used flow cytometry of tissue scraped from the dorsal  
468 skull of C57BL/6 wild-type non-reporter mice. In addition to LysM (Fig. 4G), other gating  
469 was used to select cells expressing Ly6G, an integrin-binding protein strongly expressed only  
470 on neutrophils<sup>76,77</sup>, although detectable on eosinophils<sup>78</sup>, and also CD11c, a marker of  
471 dendritic cells (DC) and macrophages<sup>32,79</sup> (Fig. 4 H, I). In agreement with the intravital  
472 imaging (Fig. 4 E), the number of LysM<sup>+</sup> increased over about 5-10h then tended to decrease  
473 (Fig. 4 G and H). The time course of Ly6G expression appears to be delayed compared to  
474 that of LysM. Since the expression of the *lysM* gene is driven differently from that of *ly6G*,  
475 changes in their relative quantities might be expected as the neutrophil population responds to  
476 the presence of Sp<sup>31,80</sup>. As well as LysM<sup>+</sup> cells, the number of CD11c<sup>+</sup> cells also increased  
477 after nasal infection (Fig. 4I). In videos of the dorsal meninges of infected CD11c-eYFP  
478 reporter mice (Supplementary Video 3) nearly all the YFP<sup>+</sup> cells displayed a rapid extension  
479 and retraction of dendrites, suggesting that they, and therefore most of the CD11c<sup>+</sup> cells of  
480 Fig. 4I, were dendritic cells. The number of CD11c<sup>+</sup> cells in the dorsal pachymeninx  
481 increased some ten-fold, to a peak at about 10h (Fig. 4I). This increase is much earlier than  
482 those reported in the nasopharynx and nose-associated lymph nodes, which were insignificant  
483 until 3 weeks after nasal infection with Sp<sup>56</sup>. It is also much faster than the increase in  
484 pachymeningeal DCs caused by trypanosomiasis, which occurs between 5 and 10 days after  
485 infection<sup>41</sup>.

486

487 **The speed of translocation from nasopharynx to meninges is size dependent.**

488 Unlike pneumococci, chemically inert microspheres are not susceptible to destruction  
489 by the host's defenses or by fixation of the tissue, nor can they multiply, hence tracking is  
490 simplified. In addition, the brightness and stability of the microsphere fluorescence gives  
491 more confidence that the signals detected by microscopy were not artifacts. In Fig. 3 A,C, it  
492 was shown that fluorescent polystyrene microspheres with a diameter of 1  $\mu\text{m}$ , close to that  
493 of Sp, reached the dorsal pachymeninx from the nasal cavity in under 30min. Since they  
494 reached the same destination as Sp and with similar rapidity, we hypothesize that they may  
495 have been transported in the same way. To obtain clues to the mechanism of translocation,  
496 we asked if it could support microspheres of diameter greater than 1 $\mu\text{m}$ . We therefore tested  
497 and compared the translocation of microspheres of diameters 1, 5 and 10  $\mu\text{m}$ . At 30 min after  
498 nasal administration, microscopic observation of microspheres in the meninges overlying the  
499 olfactory bulb suggested abundance in the order 1 $\mu\text{m}$ <5 $\mu\text{m}$ <10  $\mu\text{m}$  (Fig. 5 A) while, in  
500 contrast, in the dorsal meninges the order of abundance was 1 $\mu\text{m}$ >5 $\mu\text{m}$ >10 $\mu\text{m}$  (Fig. 5 B).  
501 These distributions were quantified by flow cytometry on pachymeningeal tissue scraped  
502 from the two areas of the skull (Fig. 5 C). In contrast to the CFUs (Fig. 1D), at 30 min the  
503 number of 1  $\mu\text{m}$  microspheres in the dorsal pachymeninx was higher than in the OB+Skull  
504 tissue. The number of 1 $\mu\text{m}$  microspheres present in the dorsal pachymeninx was  $0.55 \pm 0.16\%$   
505 of the number instilled in the nares. This is some 100-fold higher than that of microspheres  
506 with diameters of 5  $\mu\text{m}$  ( $0.0064 \pm 0.0004\%$ ) and 10  $\mu\text{m}$  ( $0.0054 \pm 0.004\%$ ) (Fig. 5 E).  
507 Conversely, in the pachymeningeal tissue above the olfactory bulb, no significant differences  
508 were found between the three sizes of microspheres (Fig. 5 D). The abundance of 5 and 10  
509  $\mu\text{m}$  microspheres in the pachymeninx of the olfactory bulb, compared to their paucity in the  
510 dorsal pachymeninx, with the opposite being true for 1  $\mu\text{m}$  microspheres, shows that the  
511 transport of the larger microspheres is hindered. Since the data are limited to one time point,  
512 it is not possible to say if the hindrance of the larger microspheres is uniform along the  
513 pathway (they travel more slowly), or if it occurs particularly caudad to the meninges of the  
514 olfactory bulb.

515 To see if Sp and microspheres were passing through the cribriform plate, we  
516 removed brain tissue from above the ethmoid bone post-mortem until the tissue was thin  
517 enough to allow two-photon imaging of the cribriform plate and its overlying tissue. The  
518 foramina were clearly visible (Fig. 6 A), and the overlying collagen of the dura mater  
519 appeared also to have holes that could allow passage of olfactory nerve bundles (Fig. 6 B). In  
520 other mice, we administered fluorescent Sp or microspheres to the nose, culled the mouse at



521 15 min. Imaging of the cribriform plate and overlying tissue in a tissue bath showed Sp and  
522 microspheres very close to the bone (Fig. 6 C, D). Both Sp and microspheres were present  
523 very close to the bone, moving slowly, if at all. This supports the conclusion that Sp and  
524 microspheres passed through the cribriform plate and entered the pachymeninx. Some  
525 microspheres were in the superfusate, and drifted with its thermal convection (squiggles in  
526 Fig. 6 C). This shows that they were not trapped inside cells.  
527

## 528 Discussion

529

530 We have shown that in mice infected by horizontal transmission similar to the natural  
531 mode of transmission in humans<sup>43-46</sup>, pneumococci can invade the meninges without  
532 detectable bacteraemia (Fig. 1C). Since we were particularly interested in dissemination at  
533 short times (minutes) after instillation to the nasopharynx, and also reproducible infections,  
534 we had recourse to using nasal instillation, so that the time of infection and the number of Sp  
535 applied could be controlled. This procedure is widely used for studying the entry of  
536 pathogens into the central nervous system<sup>7,9,10,33</sup>. We chose a dose of Sp ( $10^8$  CFU/mouse)  
537 that reliably led to dissemination. Although this dose is at the higher end of the range used by  
538 most previous studies<sup>10,46,81</sup>, it should not prevent elucidation of the anatomical pathway at  
539 times too early for cell damage to occur; at longer times, there were no signs of major  
540 damage to the nasal mucosa, such a bacteraemia. We used a self-limiting model, as used by  
541 others, e.g.,<sup>9,10</sup>, in which the administration of pneumococci did not lead to the development  
542 of any overt disease symptoms. Hence our results describe the early stages of pneumococcal  
543 entry into the central nervous system, upon intranasal administration. These are the early  
544 events and entry route that are almost impossible to study in the clinic.

545 Our key novel finding is the rapid invasion of the pachymeninx by *S. pneumoniae*. We  
546 showed that upon intranasal instillation, Sp can reach the pachymeninx very rapidly, within 2  
547 min. We have found no previous studies that have examined the dorsal meninges earlier than  
548 one hour after intranasal administration of material of any kind. At one hour, Clark<sup>82</sup> found  
549 Prussian blue in the pachymeninx, and Galeano et al.<sup>27</sup> found stem cells at 2h, as we found  
550 for Sp and microspheres (Figs 1D, 2,5). The prime evidence that the Sp were in the  
551 pachymeninx, rather than the leptomeninx, is the proximity of Sp to the skull (Fig. 2A-I) and  
552 to LYVE-1+ structures<sup>59,60</sup> (Fig. 2J-M). This finding is supported by the absence of viable  
553 pneumococci in the CSF at 72h post-infection which suggests that Sp did not breach the  
554 arachnoid barrier layer and reach the CSF channels in the leptomeninx<sup>20,25,74,83</sup> (Fig. 6 E,F).  
555 The absence of viable pneumococci in the CSF, combined with the absence of clinical  
556 symptoms, raises questions on the pathological importance of our finding. In the clinic, acute  
557 bacterial meningitis is not normally diagnosed if viable bacteria are absent from the CSF<sup>84,85</sup>.  
558 However, a number of reports suggest that CSF-negative cultures do not rule out an  
559 intracranial bacterial pathology<sup>86-88</sup>, nor does the absence of clinical symptoms<sup>89-92</sup>.

560 The flow cytometry analysis of Ly6G<sup>+</sup> cells and the intravital imaging of LysM<sup>+</sup> cells  
561 showed that, upon infection, the number and mean speed of LysM<sup>+</sup> cells in the dorsal  
562 pachymeninx increase up to 10h post-infection, these events being hallmarks of local

563 inflammation and immune cell activation. Although this recruitment of LysM<sup>+</sup> appears to be  
564 too slow to account for the rapid fall in CFUs over the first 30 min in the dorsal skull  
565 preparation, after the subsequent rebound, the number of CFUs begins to fall again at less  
566 than 5h post-infection, as the LysM<sup>+</sup> population approaches its maximum. It appears  
567 therefore, that the LysM<sup>+</sup> population increases until the clearance of Sp is established<sup>68,93</sup>,  
568 then begins to fall. Intense immune reactions in the pachymeninx (rather than the  
569 leptomeninx) have been much studied for their occurrence in migraine<sup>21</sup>, and also observed in  
570 experimental autoimmune encephalitis<sup>94,95</sup>, trypanosomiasis<sup>41</sup> and infection by lymphocytic  
571 choriomeningitis virus<sup>72</sup>. The immune cells may have arrived by extravasation from dural  
572 vessels<sup>41,96</sup>, or from the skull bone marrow (Herisson et al. 2018) by way of the  
573 transcalvarial channels that contain veins<sup>73,97,98</sup>. This recruitment of immune cells failed,  
574 however, to clear the bacteria and was followed instead by sustained, albeit decreasing,  
575 densities of Sp over days (Fig. S2). It remains to be determined what conditions are  
576 permissive to the persistence of Sp within the meninges e.g., T regulatory-mediated  
577 mechanisms<sup>99,100</sup>.

578 We found that 1 µm microspheres, as well as pneumococci (which have about the  
579 same diameter), translocate rapidly from the nasopharynx to the pachymeningeal  
580 compartment of the dorsal meninges. In the case of microspheres, this compartment was  
581 further distinguished from the subarachnoid space by injecting microspheres of a different  
582 colour in the cisterna magna; it is known that from there, material is carried by CSF to the  
583 dorsal subarachnoid space<sup>41,63,64</sup> (Fig. 3). Further, both microspheres and Sp appear to pass  
584 through the cribriform plate (Fig. 6 C, D). Hence, we hypothesize that they translocate along  
585 the same pathway.

586 At least five anatomical routes of transport through the foramina of the cribriform  
587 plate<sup>11</sup> have been proposed: transport within axons (anterograde along the olfactory axons  
588<sup>101,102</sup>) or retrograde along the trigeminal axons<sup>103</sup>; transport within the olfactory nerve  
589 ensheathing cells<sup>8,104-106</sup>, transport along extracellular, 'perineural', spaces of the nerves  
590<sup>8,101,107-109</sup>, transport in exiting lymph vessels<sup>59,110</sup> and transport within or close to the  
591 periosteum<sup>27</sup>. Objects as large as pneumococci or micron-sized microspheres diffuse much  
592 too slowly for diffusion to account for the rapid transport observed here, so either convection  
593 in a flowing fluid, or some form of active transport is necessary. Axonal transport, typically  
594 0.15 mm/min<sup>111,112</sup> would take 33 min for a distance of 5 mm from nasopharynx into the  
595 cranial meninges, and is therefore also too slow. Further arguments against such an  
596 intracellular route are that the olfactory axons are typically only 0.2 µm in diameter<sup>113</sup>, much  
597 less than the diameter of Sp, and that sialic acid, a component of the extracellular glycocalyx

598 of almost all cells<sup>114</sup> promotes translocation of Sp to the olfactory bulb<sup>9,10</sup>, which suggests  
599 that interaction with extracellular structures is important for the translocation. As for  
600 convection, a puzzle is that numerous results show an efflux of fluid from cranium to nose,  
601 rather than an influx<sup>115-118</sup>. The major conduits for efflux appear to be the spaces between the  
602 ensheathing cells that fasciculate the olfactory nerve<sup>113,119,120</sup> and the lymph vessels<sup>59,110</sup>.  
603 The former may drain the subarachnoid space<sup>82,119,120</sup> and the latter the pachymeninx<sup>74,121-</sup>  
604<sup>123</sup>. Although there are reports of extracellular transport from the nasal mucosa towards the  
605 cribriform plate along the olfactory nerve<sup>8,82,110,124</sup>, a third extracellular route, described by  
606 Galeano et al.<sup>27</sup>, along a space between the lamina propria and the turbinate bone, has the  
607 merits that it connects directly to the pachymeninx and has not been reported to carry an  
608 efflux. Of the known anatomical routes, this is therefore the most probable for the transport  
609 of Sp (Fig. 6F), for 1 µm microspheres and perhaps other particulate matter such as pollutants  
610 and drugs<sup>28</sup> targeting the central nervous system (CNS). Microspheres of diameters 5 and 10  
611 µm were transported more slowly (Fig. 5), suggesting hindrance by the narrowness of spaces  
612 or extracellular matrix.

613 Our study highlights the anatomical structures and fluid networks connecting the  
614 nasal cavity to the central nervous system, and their barrier functions. By establishing that  
615 both pneumococci and microspheres translocate in minutes from the nasal cavity to the dorsal  
616 pachymeninx of mice, our data show for the first time the existence of a previously  
617 unrecognised inward flow of fluid through to the CNS. Should the CSF and/or brain  
618 parenchyma be subsequently infected, this would mean that pneumococci (and perhaps any  
619 microparticles of similar size) would be capable of crossing the arachnoid barrier membrane.  
620 The exact mechanisms remain to be determined. Assuming similarities with animal models,  
621 our findings have significant implications for the diagnosis and clinical management of CNS  
622 infection in human patients. Further investigations into the nose-to-meninges translocation  
623 pathway will provide additional insights into not only the nature and the dynamics of host-  
624 pathogen interactions in the CNS, but also the development of novel drug delivery systems to  
625 the brain, and the etiology of brain damage caused by air-borne particles such as pollutants.

## 626 **Authors contributions**

627 T.A., J.A.C., A.K. and M.Y. designed the study. T.A., J.A.C., S.P., S.K., and M.Y. performed  
628 experiments. T.A., J.A.C., A.K, and M.Y. wrote the manuscript, and the other authors  
629 contributed to data analysis or writing. All authors read and approved the final version of the  
630 manuscript.

631

632

## 633 **Acknowledgments**

634 We acknowledge funding support from Meningitis Now, the UK Medical Research Council  
635 (Programme Grant Number MR/P011284/1) awarded to A.K. and the Mahidol-Liverpool  
636 PhD Scholarship awarded to T.A. We also acknowledge Joshua I. Gray for assistance with  
637 intravenous injections; David Mason, Jennifer Adcott, Dr Marco Marcello, and Dr James  
638 Szczerkowski at the University of Liverpool, Centre for Cell Imaging, for assistance with  
639 image acquisition and analysis; Dr Lynn MacLaughlin, Sarah Roper and the technical staff  
640 at the Biomedical Services Unit , University of Liverpool; and Colin Hughes and the  
641 technical staff at the Central Research Facility, University of Glasgow. The authors declare  
642 no conflicts of interest.

643

## 644 **Competing interests**

645 The authors report no competing interests.

646 **Online supplementary material.**

647

648 Supplementary Fig. S1 **Horizontal transmission of *Streptococcus pneumoniae* in mice without**  
649 **Influenza A virus co-administration.** Pneumococcal CFUs determined in various tissues under  
650 the same experimental conditions as Fig. 1C when influenza virus A was not co-administered  
651 with pneumococci.

652

653 Supplementary Fig. S2 **Long-term monitoring of pneumococcal density after intranasal**  
654 **instillation.** Pneumococcal CFUs determined in various tissues at up to 14 days after  
655 intranasal administration with *Streptococcus pneumoniae*.

656

657 Supplementary Fig. S3 **Fluorescence microscopy images of *Streptococcus pneumoniae*.** Two-  
658 photon microscopy image of strain 2 serotype D39-loaded with CFSE using (A), and  
659 confocal microscopy image of serotype 1/ST217 pneumococci stained with BacLight™ Red  
660 (B).

661

662

663 Supplementary Fig. S4 **Confocal images of mouse whole skull mount with transmitted light.**  
664 Confocal images in Fig. 2 panels K and L shown here with transmitted light: Sp-infected  
665 mouse (A) and uninfected mouse (B).

666

667 Supplementary Fig. S5 **Immune cell FACS gating strategy.** Flow cytometry gating strategies  
668 used for LysM<sup>+</sup>, CD11c<sup>+</sup>, and Ly6G<sup>+</sup> cells.

669

670

671

672

673 Supplementary movie 1. **Intravital imaging of an uninfected LysM- eGFP mouse.** Two-photon  
674 imaging through thinned skull, under the same experimental conditions as Fig. 4D.

675

676 Supplementary movie 2. **Intravital imaging of an Sp-infected LysM-eGFP mouse.** Two-photon  
677 imaging through thinned skull at 10h post-infection, under the same experimental conditions  
678 as Fig. 4C.

679

680 Supplementary movie 3. **Intravital imaging of a Sp-infected CD11c-eYFP mouse.** Two-photon  
681 imaging through thinned skull at 3.5h post-infection, excitation at 960 nm with x20, N.A. 1.0  
682 water immersion objective. Detector channels were set at <490 nm and 570 nm for second  
683 harmonic generation and CD11c, respectively. Z-stacks = 24  $\mu\text{m}$  deep and total acquisition  
684 duration = 27 min.

685

686

687

## 688 **Figure legends**

689

690 **Figure 1. Pneumococci transmitted via horizontal transfer or intranasally instilled reach**  
691 **the meninges, by-passing the blood systemic circulation.** (A). Schematic representation  
692 showing the situation of the tissues investigated. CSF: Cerebrospinal fluid. Top right inset: Schematic  
693 magnification of the meninges of the dorsal brain showing the outer layer, the pachymeninx, which  
694 contains the collagenous dura mater, the inner layer, the leptomeninx, containing the subarachnoid  
695 space, and the underlying brain cortex. Both layers contain blood vessels (red circles). (B) Three  
696 index mice of a group of five C57/BL6J were infected intranasally with Sp serotype1, strain 217. On  
697 day 3, all mice were infected intranasally with Influenza A/HKx31 (H3N2) virus strain. On days 6, 7,  
698 8 and 9, five animals (3 index + 2 contact) per time point were killed with CO<sub>2</sub> and the number of  
699 CFUs per tissue sample counted. (C) 1-6: Numbers of CFUs detected per tissue sample from index  
700 (n=12) and contact mice (n=8) on days 6, 7, 8 and 9 all confounded. Each dot represents one mouse.  
701 (D) 1-6: Pneumococci (Serotype 2, strain D39) were intranasally administered and CFUs counted  
702 between 0 and 72h in tissue samples as for (C). Data are shown as mean +/- SEM (n=5 mice per time  
703 point).

704

705 **Figure 2. Intranasally administered pneumococci are rapidly and predominantly found**  
706 **in the pachymeningeal compartment of the dorsal meninges.** (A) Pneumococci were applied  
707 to the nose and the mice euthanized 10h later. The skull and brain were separated and CFUs were  
708 counted for tissue from the superficial cortex + attached tissue, and for tissue scraped from the skull  
709 ('pachymeninx'). The numbers of CFUs were counted and expressed relative to the weight of protein  
710 per tissue sample. In the infected mice, the density of CFUs was much higher in the tissue scraped  
711 from the skull. (B) CFSE-labelled Sp 90 min post-infection in tissue adhering to the skull after  
712 removal of the brain and imaged from the intracranial face (the 'amaguri' preparation of Toriumi et  
713 al., (2011). Excitation was by laser at 840 nm which produced two-photon excitation of CFSE (green),  
714 and Second Harmonic Generation SHG (blue) from collagen and skull bone. Image representative of  
715 n=3 mice. Maximum intensity Z-projection, z=171 µm. (C) Under identical imaging conditions to  
716 (B), no green particles were detected in an uninfected naive mouse. Maximum intensity Z-projection,  
717 z=178 µm. (D, F) CFSE-labelled *S. pneumoniae* were instilled in the nose of a mouse. Thirty minutes  
718 later, the mouse was killed with CO<sub>2</sub> and perfused with DiI to label blood vessels (Li et al., 2008).  
719 Imaging was done through the skull and into the meninges. CFSE-labelled Sp (green) are seen in a z-  
720 projection 444µm deep (D). In a 3D projection Sp are seen close to the skull (blue:SHG) and above  
721 large blood vessels (red), but are absent from deeper layers (F). (E, G) Under identical imaging  
722 conditions to (F), no green particles were detected in an uninfected mouse. Z-stack (E) and 3D  
723 representation (G). Scale bar: 50µm. (H) *S. pneumoniae* expressing mKate were instilled in the nose.  
724 After 3.7h, the dorsal meninges and underlying brain were imaged *in vivo* through the skull with  
725 excitation at 1140 nm. The SHG from skull bone and collagen is green and emission from mKate is



726 red. A representative XZ section including two groups of pneumococci is shown. **(I)** Similar red  
727 signals were not seen in uninfected mice under the same imaging conditions as **(H)**. **(J, K)** *S.*  
728 *pneumoniae* stained with BacLight™Red were instilled in the nose. At 15 min post-administration,  
729 mice were perfused transcardially with PBS followed by fixing solution (4% PFA). Dorsal skull  
730 mounts were stained with anti-LYVE1 antibody and imaged on the skull bone-oriented surface with  
731 excitation at 561 nm and 405 nm. A representative XZ projection of the skull whole mount is shown  
732 for the Sp-infected **(J)** and uninfected **(K)** mouse. **(L, M)** Maximum intensity Z- projection of the  
733 images shown in **(J)** and **(K)**, respectively  $z=16.75\ \mu\text{m}$  and  $z=340.37\ \mu\text{m}$ .

734

735

736 **Figure 3. Microspheres administered intranasally were found in a layer close to the skull (A-C)**  
737 One-micron diameter green fluorescent microspheres were applied to the nose of a mouse **(A)** and  
738  $2\ \mu\text{m}$  Nile Red-labelled microspheres were injected in the cisterna magna of another mouse **(B)**. A  
739 third mouse was subjected to both procedures, i.e., intranasal administration of  $1\ \mu\text{m}$  green fluorescent  
740 microspheres followed immediately by intracisternal injection of  $2\ \mu\text{m}$  Nile Red-labelled microspheres  
741 **(C)**. In each case, 30 min after the infection, the mouse was euthanized, and the meninges and cortex  
742 were examined through the skull with two-photon microscopy. Microspheres administered  
743 intranasally were only found in a layer close to the skull **(A,C)** while those infused in the cisterna  
744 magna were deeper **(B,C)**. Scale bar:  $50\ \mu\text{m}$ . **(D)** The distances from the skull of all fluorescent Sp  
745 (black circles) measured in the 3D reconstructions measured post mortem as for Figure 2, panels D-I.  
746 The distances from the skull of Sp and fluorescent microspheres measured in the 3D reconstructions  
747 measured post-mortem as for Figure 3, panels A-C, upon intranasal instillation of Sp (black circles,  
748  $n=120$  signals, imaging of 4 mice), or upon intranasal (green circles,  $n=90$  signals, imaging of 4 mice)  
749 or intracisternal (red circles,  $n=6$  signals, imaging of 3 mice) administration of  
750 microspheres. \*\*\*\* $p<0.0001$ , IN: Intranasal, IC: Intracisternal, MS: Microspheres, Sp: *Streptococcus*  
751 *pneumoniae*.

752

753 **Figure 4. Intranasal infection by *S. pneumoniae* leads to transient recruitment and**  
754 **activation of LysM<sup>+</sup> in the calvarial pachymeninx. (A, B).** In vivo two-photon imaging shows  
755 that nearly all intracranial LysM<sup>+</sup> cells are in the meninges. **(A)**, Horizontal view of a 3D  
756 reconstruction from a Z-stack of an uninfected mouse showing only LysM<sup>+</sup>GFP cells, which lie in a  
757 shallow layer. **(B)**, A different view of the 3D image in **(A)** showing, in addition to the LysM<sup>+</sup>GFP  
758 cells (in green), the skull bone (in blue: SHG), nuclei of the pachymeninx (blue from intravenous  
759 injection of furamidine) and blood vessels (shown orange-yellow, labeled with rhodamine). Excitation  
760 at 840 nm. **(C)** Tracks of LysM<sup>+</sup> cells in the meninges of a mouse imaged at 10h after intranasal  
761 administration of pneumococci. Z-projection of Z stacks  $23\ \mu\text{m}$  deep, time series for 15 min. **(D)**  
762 Tracks of LysM<sup>+</sup> cells in the meninges of an uninfected mouse under the same imaging conditions as  
763 **(C)** z-projection  $30\ \mu\text{m}$  deep, time series for 32 min. **(E)** Numbers of LysM<sup>+</sup> GFP cells per unit area of

764 the meninges counted in *in vivo* images. Each point was obtained from one Z stack. The linear  
765 regression line has a slope greater than one with  $P = 0.016$ . **(F)** Mean track speeds of mobile GFP<sup>+</sup>  
766 cells in the same imaging conditions as **(E)**. **(G-I)**. Flow cytometry of cells from tissue scraped from  
767 the calvarial skull. Cells selected as CD45<sup>+</sup>, CD4<sup>+</sup> and CD11b<sup>+</sup> were further sorted into LysM<sup>+</sup> (G),  
768 Ly6G<sup>+</sup> (H) or CD11c<sup>+</sup> (I) cells. Each dot represents one mouse, error bars are SEMs.

769

770 **Figure 5. The speed of transit from nose to calvarial meninges is lower for larger**  
771 **microspheres.** Transport from the nose of fluorescent microspheres of three diameters was  
772 examined: 1 $\mu$ m (yellow-green), 5  $\mu$ m and 10  $\mu$ m (Nile red). 10<sup>5</sup> microspheres in 10 $\mu$ l were applied to  
773 the nose and the mice were killed 30 min later. **(A, B)** Two-photon imaging *ex vivo* through the skull  
774 and into the meninges in the areas of the olfactory bulb (A) and the dorsal brain (B). Z-stacks 154 $\mu$ m  
775 deep. Excitation was at 840 nm which produced fluorescence from the microspheres and blue SHG  
776 from bone and collagen. **(C-E)** For each of the three diameters of microsphere (1,5 and 10  $\mu$ m) five  
777 mice were inoculated. 30 min later, pachymeningeal tissue was scraped from the skull covering the  
778 olfactory bulb and from the dorsal skull and the numbers of microspheres counted by flow cytometry.  
779 Abbreviations: a.u., arbitrary units; F.I. fluorescence intensity. The numbers of beads detected by flow  
780 cytometry for each tissue sample (within the dashed rectangles in (C)) are plotted in (D) where each  
781 dot represents one mouse. To better illustrate the dynamics of the translocation, the numbers were  
782 then expressed as percentages of the number (10<sup>5</sup>) of microspheres applied to the nose and plotted on  
783 a linear scale (E). Error bars indicate SEMs, One-way ANOVA followed by Tukey's *post hoc* test,  
784 \*\* $p < 0.01$ .

785

786

787 **Figure 6. Microspheres and *S. pneumoniae* on the cribriform plate.** Two-photon images of  
788 the intracranial face of freshly dissected ethmoid bone covered by a layer of olfactory bulb tissue  
789 (which gives no signal). **(A)** Excitation at 900 nm gives blue SHG from the cribriform plate. This was  
790 a naive LysM-GFP reporter mouse. **(B)** Excitation at 1140 nm gives an image of collagen-like fiber  
791 structures, presumably dura mater. This was a CD11c-YFP reporter mouse. YFP is poorly excited at  
792 1140 nm but faint CD11c<sup>+</sup> cells can be seen. **(C,D)** 3.8 x 10<sup>7</sup> yellow-green fluorescent polystyrene  
793 microspheres of 1  $\mu$ m diameter size (green) (C) or BacLight™ Red-stained pneumococci (red) (D)  
794 were administered intranasally. The mice were culled at 30 min and the intracranial face of the  
795 cribriform plate (blue, SHG) imaged with excitation at 840 nm. BacLight™ Red was detected at 571-  
796 664 nm. Microspheres and pneumococci are seen close to the bone; some microspheres are drifting in  
797 the superfusate. **(E)** Scheme (not to scale) of the anatomy of the pathway (partly hypothetical, sagittal  
798 section). Olfactory neurons with their cell bodies in the olfactory epithelium send axons through the  
799 foramina of the cribriform plate where they are surrounded by cells which have been described as  
800 'olfactory ensheathing cells'<sup>11,125-128</sup> or as forming extensions to some, or all, of the pia, the  
801 arachnoid, the dura and the periosteum<sup>27,129-131</sup>. Microspheres and pneumococci (yellow dots) are

802 transported through the cribriform plate and are found in the pachymeninx (yellow arrows) which is  
803 separated from the leptomeninx by the arachnoid barrier layer (abl, red line). **(F)** Enlargement of the  
804 dashed rectangle in (D). Cerebrospinal fluid (CSF) flows out of the subarachnoid space of the  
805 leptomeninx (lm) along extracellular spaces in a bundle of olfactory nerve fibres that traverses a  
806 foramen of the cribriform plate (cp). Lymph draining from the pachymeninx flows out<sup>59,122</sup> through a  
807 lymph vessel (lv), Sp and microspheres are carried into the pachymeninx (pm) along a space adjacent  
808 to the lamina propria (lp) (Galeano et al. 2018). The arachnoid barrier layer (abl) is indicated by a red  
809 line.  
810  
811

812

## 813 **References**

814

- 815 1. Cain MD, Salimi H, Diamond MS, Klein RS. Mechanisms of Pathogen Invasion into  
816 the Central Nervous System. *Neuron*. 2019;103(5):771-783.
- 817 2. Kristensson K. Microbes' roadmap to neurons. *Nature Reviews Neuroscience*.  
818 2011;12(6):345-357.
- 819 3. Salvadori G, Junges R, Morrison DA, Petersen FC. Competence in *Streptococcus*  
820 *pneumoniae* and close commensal relatives: mechanisms and implications. *Front Cell*  
821 *Infect Microbiol*. 2019;9:94.
- 822 4. Mook-Kanamori BB, Geldhoff M, van der Poll T, van de Beek D. Pathogenesis and  
823 pathophysiology of pneumococcal meningitis. *Clin Microbiol Rev*. 2011;24(3):557-  
824 591.
- 825 5. Shears RK, Jacques LC, Naylor G, et al. Exposure to diesel exhaust particles  
826 increases susceptibility to invasive pneumococcal disease. *J Allergy Clin Immunol*.  
827 2020;145(4):1272-1284.e1276.
- 828 6. Jusot JF, Neill DR, Waters EM, et al. Airborne dust and high temperatures are risk  
829 factors for invasive bacterial disease. *J Allergy Clin Immunol*. 2017;139(3):977-  
830 986.e972.
- 831 7. Marra A, Brigham D. *Streptococcus pneumoniae* causes experimental meningitis  
832 following intranasal and otitis media infections via a nonhematogenous route. *Infect*  
833 *Immun*. 2001;69(12):7318-7325.
- 834 8. Rake G. The rapid invasion of the body through the olfactory mucosa. *J Exp Med*.  
835 1937;65(2):303-315.
- 836 9. van Ginkel FW, McGhee JR, Watt JM, Campos-Torres A, Parish LA, Briles DE.  
837 Pneumococcal carriage results in ganglioside-mediated olfactory tissue infection.  
838 *Proc Natl Acad Sci U S A*. 2003;100(24):14363-14367.
- 839 10. Hatcher BL, Hale JY, Briles DE. Free sialic acid acts as a signal that promotes  
840 *Streptococcus pneumoniae* invasion of nasal tissue and nonhematogenous invasion of  
841 the central nervous system. *Infect Immun*. 2016;84(9):2607-2615.
- 842 11. Norwood JN, Zhang Q, Card D, Craine A, Ryan TM, Drew PJ. Anatomical basis and  
843 physiological role of cerebrospinal fluid transport through the murine cribriform plate.  
844 *eLife*. 2019;8:e44278.
- 845 12. Bojsen-Møller F. Demonstration of terminalis, olfactory, trigeminal and perivascular  
846 nerves in the rat nasal septum. *J Comp Neurol*. 1975;159(2):245-256.
- 847 13. Kim. Acute bacterial meningitis in infants and children. *Lancet Infect Dis*.  
848 2010;10(1):32-42.
- 849 14. Kim. Pathogenesis of bacterial meningitis: from bacteraemia to neuronal injury. *Nat*  
850 *Rev Neurosci*. 2003;4(5):376-385.

- 851 15. Haines DE, Harkey HL, al-Mefty O. The "subdural" space: a new look at an outdated  
852 concept. *Neurosurgery*. 1993;32(1):111-120.
- 853 16. Rustenhoven J, Drieu A, Mamuladze T, et al. Functional characterization of the dural  
854 sinuses as a neuroimmune interface. *Cell*. 2021;184(4):1000-1016.e1027.
- 855 17. Khatib U, van de Beek D, Lees JA, Brouwer MC. Adults with suspected central  
856 nervous system infection: A prospective study of diagnostic accuracy. *J Infect*.  
857 2017;74(1):1-9.
- 858 18. Weed LH. Studies on Cerebro-Spinal Fluid. No. III : The pathways of escape from the  
859 Subarachnoid Spaces with particular reference to the Arachnoid Villi. *J Med Res*.  
860 1914;31(1):51-91.
- 861 19. Ray BS, Wolff HG. Experimental studies on headache: pain-sensitive structures of the  
862 head and their significance in headache. *Arch Surg*. 1940;41:813-856.
- 863 20. Coles JA, Stewart-Hutchinson PJ, Myburgh E, Brewer JM. The mouse cortical  
864 meninges are the site of immune responses to many different pathogens, and are  
865 accessible to intravital imaging. *Methods*. 2017;127:53-61.
- 866 21. Rua R, McGavern DB. Advances in meningeal immunity. *Trends Mol Med*.  
867 2018;24(6):542-559.
- 868 22. Pietrobon D, Moskowitz MA. Chaos and commotion in the wake of cortical spreading  
869 depression and spreading depolarizations. *Nat Rev Neurosci*. 2014;15(6):379-393.
- 870 23. Lamar RV. Chemo-immunological studies on localised infections: fourth paper:  
871 experimental pneumococcal meningitis and its specific treatment. *J Exp Med*.  
872 1912;16(5):581-606.
- 873 24. Monti A. Contributo allo studio della meningite cerebro-spinale. *Riforma Med*.5:344-  
874 345 and 350-351 (1889). cit. Bull, C.G. Immunity factors in pneumococcus infection  
875 in the dog. *J Exp Med* (1916).
- 876 25. Nabeshima S, Reese TS, Landis DMD, Brightman MW. Junctions in the meninges  
877 and marginal glia. *J Comp Neurol*. 1975;164(2):127-169.
- 878 26. Brøchner CB, Holst CB, Møllgård K. Outer brain barriers in rat and human  
879 development. *Front Neurosci*. 2015;9:75-75.
- 880 27. Galeano C, Qiu Z, Mishra A, et al. The route by which intranasally delivered stem  
881 cells enter the central nervous system. *Cell Transplant*. 2018;27(3):501-514.
- 882 28. Lochhead JJ, Davis TP. Perivascular and perineural pathways involved in brain  
883 delivery and distribution of drugs after intranasal administration. *Pharmaceutics*.  
884 2019;11(11).
- 885 29. Wang Z, Xiong G, Tsang WC, Schätzlein AG, Uchegbu IF. Nose-to-Brain Delivery. *J*  
886 *Pharmacol Exp Ther*. 2019;370(3):593-601.
- 887 30. Lucchini RG, Dorman DC, Elder A, Veronesi B. Neurological impacts from  
888 inhalation of pollutants and the nose-brain connection. *Neurotoxicology*.  
889 2012;33(4):838-841.

- 890 31. Faust N, Varas F, Kelly LM, Heck S, Graf T. Insertion of enhanced green fluorescent  
891 protein into the lysozyme gene creates mice with green fluorescent granulocytes and  
892 macrophages. *Blood*. 2000;96(2):719-726.
- 893 32. Lindquist RL, Shakhar G, Dudziak D, et al. Visualizing dendritic cell networks in  
894 vivo. *Nat Immunol*. 2004;5(12):1243-1250.
- 895 33. Jacques LC, Panagiotou S, Baltazar M, et al. Increased pathogenicity of  
896 pneumococcal serotype 1 is driven by rapid autolysis and release of pneumolysin. *Nat*  
897 *Commun*. 2020;11(1):1892.
- 898 34. Kadioglu A, Brewin H, Härtel T, et al. Pneumococcal protein PavA is important for  
899 nasopharyngeal carriage and development of sepsis. *Mol Oral Microbiol*.  
900 2010;25(1):50-60.
- 901 35. Pikiš A, Campos JM, Rodriguez WJ, Keith JM. Optochin resistance in *Streptococcus*  
902 *pneumoniae*: mechanism, significance, and clinical implications. *J Infect Dis*.  
903 2001;184(5):582-590.
- 904 36. Miles AA, Misra SS, Irwin JO. The estimation of the bactericidal power of the blood.  
905 *J Hyg (London)*. 1938;38(6):732-749.
- 906 37. Vander Top EA, Perry GA, Gentry-Nielsen MJ. A novel flow cytometric assay for  
907 measurement of in vivo pulmonary neutrophil phagocytosis. *BMC Microbiol*.  
908 2006;6:61-61.
- 909 38. Li Y, Song Y, Zhao L, Gaidosh G, Laties AM, Wen R. Direct labeling and  
910 visualization of blood vessels with lipophilic carbocyanine dye DiI. *Nat Protoc*.  
911 2008;3(11):1703-1708.
- 912 39. Toriumi H, Shimizu T, Shibata M, et al. Developmental and circulatory profile of the  
913 diploic veins. *Microvasc Res*. 2011;81(1):97-102.
- 914 40. Wouters K, Maes E, Spitz JA, et al. A non-invasive fluorescent staining procedure  
915 allows Confocal Laser Scanning Microscopy based imaging of *Mycobacterium* in  
916 multispecies biofilms colonizing and degrading polycyclic aromatic hydrocarbons. *J*  
917 *Microbiol Methods*. 2010;83(3):317-325.
- 918 41. Coles JA, Myburgh E, Ritchie R, et al. Intravital imaging of a massive lymphocyte  
919 response in the cortical dura of mice after peripheral infection by trypanosomes. *PLoS*  
920 *Negl Trop Dis*. 2015;9(4):e0003714.
- 921 42. Mathis AM, Holman JL, Sturk LM, et al. Accumulation and intracellular distribution  
922 of antitrypanosomal diamidine compounds DB75 and DB820 in African  
923 trypanosomes. *Antimicrob Agents Chemother*. 2006;50(6):2185-2191.
- 924 43. Diavatopoulos DA, Short KR, Price JT, et al. Influenza A virus facilitates  
925 *Streptococcus pneumoniae* transmission and disease. *FASEB J*. 2010;24(6):1789-  
926 1798.
- 927 44. Kono M, Zafar MA, Zuniga M, Roche AM, Hamaguchi S, Weiser JN. Single cell  
928 bottlenecks in the pathogenesis of *Streptococcus pneumoniae*. *PLoS Pathog*.  
929 2016;12(10):e1005887.



- 930 45. Zafar MA, Hammond AJ, Hamaguchi S, et al. Identification of pneumococcal factors  
931 affecting pneumococcal shedding shows that the *dlt* locus promotes inflammation and  
932 transmission. *mBio*. 2019;10(3).
- 933 46. Richard AL, Siegel SJ, Erikson J, Weiser JN. TLR2 signaling decreases transmission  
934 of *Streptococcus pneumoniae* by limiting bacterial shedding in an infant mouse  
935 Influenza A co-infection model. *PLoS Pathog*. 2014;10(8):e1004339.
- 936 47. Frederickson RG. The subdural space interpreted as a cellular layer of meninges. *Anat*  
937 *Rec*. 1991;230(1):38-51.
- 938 48. Talbot UM, Paton AW, Paton JC. Uptake of *Streptococcus pneumoniae* by respiratory  
939 epithelial cells. *Infect Immun*. 1996;64(9):3772-3777.
- 940 49. Adamou JE, Wizemann TM, Barren P, Langermann S. Adherence of *Streptococcus*  
941 *pneumoniae* to human bronchial epithelial cells (BEAS-2B). *Infect Immun*.  
942 1998;66(2):820-822.
- 943 50. Braun JS, Novak R, Murray PJ, et al. Apoptosis-inducing factor mediates microglial  
944 and neuronal apoptosis caused by pneumococcus. *J Infect Dis*. 2001;184(10):1300-  
945 1309.
- 946 51. Kadioglu A, Sharpe JA, Lazou I, et al. Use of green fluorescent protein in  
947 visualisation of pneumococcal invasion of broncho-epithelial cells in vivo. *FEMS*  
948 *Microbiol Lett*. 2001;194(1):105-110.
- 949 52. Gianinazzi C, Grandgirard D, Simon F, et al. Apoptosis of hippocampal neurons in  
950 organotypic slice culture models: direct effect of bacteria revisited. *J Neuropathol Exp*  
951 *Neurol*. 2004;63(6):610-617.
- 952 53. Novick S, Shagan M, Blau K, et al. Adhesion and invasion of *Streptococcus*  
953 *pneumoniae* to primary and secondary respiratory epithelial cells. *Mol Med Rep*.  
954 2017;15(1):65-74.
- 955 54. Belser JA, Gustin KM, Katz JM, Maines TR, Tumpey TM. Comparison of traditional  
956 intranasal and aerosol inhalation inoculation of mice with influenza A viruses.  
957 *Virology*. 2015;481:107-112.
- 958 55. de Steenhuijsen P, WAA, Jochems SP, Mitsi E, et al. Interaction between the  
959 nasal microbiota and *S. pneumoniae* in the context of live-attenuated influenza  
960 vaccine. *Nat Commun*. 2019;10(1):2981.
- 961 56. Dommaschk A, Ding N, Tort Tarres M, et al. Nasopharyngeal colonization with  
962 *Streptococcus pneumoniae* triggers dendritic cell dependent antibody responses  
963 against invasive disease in mice. *Eur J Immunol*. 2017;47(3):540-551.
- 964 57. Kjos M, Aprianto R, Fernandes VE, et al. Bright fluorescent *Streptococcus*  
965 *pneumoniae* for live-cell imaging of host-pathogen interactions. *J Bacteriol*.  
966 2015;197(5):807-818.
- 967 58. Hong JS, Greenlee KJ, Pitchumani R, et al. Dual protective mechanisms of matrix  
968 metalloproteinases 2 and 9 in immune defense against *Streptococcus pneumoniae*. *J*  
969 *Immunol*. 2011;186(11):6427-6436.

- 970 59. Aspelund A, Antila S, Proulx ST, et al. A dural lymphatic vascular system that drains  
971 brain interstitial fluid and macromolecules. *J Exp Med*. 2015;212(7):991-999.
- 972 60. Louveau A, Smirnov I, Keyes TJ, et al. Structural and functional features of central  
973 nervous system lymphatic vessels. *Nature*. 2015;523(7560):337-341.
- 974 61. Andres KH, von Düring M, Muszynski K, Schmidt RF. Nerve fibres and their  
975 terminals of the dura mater encephali of the rat. *Anat Embryol (Berl)*.  
976 1987;175(3):289-301.
- 977 62. Ueckert JE, Nebe von-Caron G, Bos AP, ter Steeg PF. Flow cytometric analysis of  
978 *Lactobacillus plantarum* to monitor lag times, cell division and injury. *Lett Appl*  
979 *Microbiol*. 1997;25(4):295-299.
- 980 63. Iliff JJ, Wang M, Liao Y, et al. A paravascular pathway facilitates CSF flow through  
981 the brain parenchyma and the clearance of interstitial solutes, including amyloid  $\beta$ . *Sci*  
982 *Transl Med*. 2012;4(147):147ra111.
- 983 64. Rennels ML, Gregory TF, Blaumanis OR, Fujimoto K, Grady PA. Evidence for a  
984 'paravascular' fluid circulation in the mammalian central nervous system, provided by  
985 the rapid distribution of tracer protein throughout the brain from the subarachnoid  
986 space. *Brain Res*. 1985;326(1):47-63.
- 987 65. Hyams C, Camberlein E, Cohen JM, Bax K, Brown JS. The *Streptococcus*  
988 *pneumoniae* capsule inhibits complement activity and neutrophil phagocytosis by  
989 multiple mechanisms. *Infect Immun*. 2010;78(2):704-715.
- 990 66. Kreisel D, Nava RG, Li W, et al. In vivo two-photon imaging reveals monocyte-  
991 dependent neutrophil extravasation during pulmonary inflammation. *Proc Natl Acad*  
992 *Sci U S A*. 2010;107(42):18073-18078.
- 993 67. Nauseef WM, Borregaard N. Neutrophils at work. *Nat Immunol*. 2014;15(7):602-611.
- 994 68. Segal AW. How neutrophils kill microbes. *Annu Rev Immunol*. 2005;23:197-223.
- 995 69. Roth TL, Nayak D, Atanasijevic T, Koretsky AP, Latour LL, McGavern DB.  
996 Transcranial amelioration of inflammation and cell death after brain injury. *Nature*.  
997 2014;505(7482):223-228.
- 998 70. McIlvried LA, Cruz JA, Borghesi LA, Gold MS. Sex-, stress-, and sympathetic post-  
999 ganglionic-dependent changes in identity and proportions of immune cells in the dura.  
1000 *Cephalalgia*. 2017;37(1):36-48.
- 1001 71. Xu H-T, Pan F, Yang G, Gan W-B. Choice of cranial window type for in vivo  
1002 imaging affects dendritic spine turnover in the cortex. *Nat Neurosci*. 2007;10(5):549-  
1003 551.
- 1004 72. Kim, Kang SS, Dustin ML, McGavern DB. Myelomonocytic cell recruitment causes  
1005 fatal CNS vascular injury during acute viral meningitis. *Nature*. 2009;457(7226):191-  
1006 195.
- 1007 73. Mecheri B, Paris F, Lübbert H. Histological investigations on the dura mater vascular  
1008 system of mice. *Acta Histochemica*. 2018;120(8):846-857.



- 1009 74. Key A, Retzius M. Studien in der anatomie des nervensystems und des bindegewebes.  
1010 *Stockholm: Samson & Wallin* 1875.
- 1011 75. Coles JA, Myburgh E, Brewer JM, McMenamin PG. Where are we? The anatomy of  
1012 the murine cortical meninges revisited for intravital imaging, immunology, and  
1013 clearance of waste from the brain. *Prog Neurobiol.* 2017;156:107-148.
- 1014 76. Fleming TJ, Fleming ML, Malek TR. Selective expression of Ly-6G on myeloid  
1015 lineage cells in mouse bone marrow. RB6-8C5 mAb to granulocyte-differentiation  
1016 antigen (Gr-1) detects members of the Ly-6 family. *J Immunol.* 1993;151(5):2399-  
1017 2408.
- 1018 77. Gumley TP, McKenzie IF, Sandrin MS. Tissue expression, structure and function of  
1019 the murine Ly-6 family of molecules. *Immunol Cell Biol.* 1995;73(4):277-296.
- 1020 78. Limkar AR, Mai E, Sek AC, Percopo CM, Rosenberg HF. Frontline Science:  
1021 Cytokine-mediated developmental phenotype of mouse eosinophils: IL-5-associated  
1022 expression of the Ly6G/Gr1 surface Ag. *J Leukoc Biol.* 2020;107(3):367-377.
- 1023 79. Hume DA, Mabbott N, Raza S, Freeman TC. Can DCs be distinguished from  
1024 macrophages by molecular signatures? *Nat Immunol.* 2013;14(3):187-189.
- 1025 80. Lee PY, Wang J-X, Parisini E, Dascher CC, Nigrovic PA. Ly6 family proteins in  
1026 neutrophil biology. *J of Leukoc Biol.* 2013;94(4):585-594.
- 1027 81. Wu HY, Virolainen A, Mathews B, King J, Russell MW, Briles DE. Establishment of  
1028 a *Streptococcus pneumoniae* nasopharyngeal colonization model in adult mice.  
1029 *Microb Pathog.* 1997;23(3):127-137.
- 1030 82. Clark WE. Report of the committee on vaccination on an anatomical investigation  
1031 into the routes by which infections may pass from the nasal cavities into the brain.  
1032 *Reports on Public Health and Medical Subjects No 54, Ministry of Health, p 1-27;*  
1033 *London, England* 1929.
- 1034 83. Yasuda K, Cline C, Vogel P, et al. Drug transporters on arachnoid barrier cells  
1035 contribute to the blood-cerebrospinal fluid barrier. *Drug Metab Dispos.*  
1036 2013;41(4):923-931.
- 1037 84. Goonetilleke UR, Scarborough M, Ward SA, Gordon SB. Proteomic analysis of  
1038 cerebrospinal fluid in pneumococcal meningitis reveals potential biomarkers  
1039 associated with survival. *The Journal of infectious diseases.* 2010;202(4):542-550.
- 1040 85. Gómez-Baena G, Bennett RJ, Martínez-Rodríguez C, et al. Quantitative Proteomics of  
1041 Cerebrospinal Fluid in Paediatric Pneumococcal Meningitis. *Sci Rep.* 2017;7(1):7042-  
1042 7042.
- 1043 86. Obaro S. Updating the diagnosis of bacterial meningitis. *The Lancet Infectious*  
1044 *Diseases.* 2019;19(11):1160-1161.
- 1045 87. Khoury NT, Hossain MM, Wootton SH, Salazar L, Hasbun R. Meningitis with a  
1046 negative cerebrospinal fluid Gram stain in adults: risk classification for an adverse  
1047 clinical outcome. *Mayo Clin Proc.* 2012;87(12):1181-1188.

- 1048 88. Elmore JG, Horwitz RI, Quagliarello VJ. Acute meningitis with a negative Gram's  
1049 stain: clinical and management outcomes in 171 episodes. *Am J Med.* 1996;100(1):78-  
1050 84.
- 1051 89. de Almeida SM, Oliveira MF, Chaillon A, et al. Transient and asymptomatic  
1052 meningitis in human immunodeficiency virus-1 subtype C: a case study of genetic  
1053 compartmentalization and biomarker dynamics. *J Neurovirol.* 2018;24(6):786-796.
- 1054 90. Gupta A, Tolan RW, Jr. Asymptomatic (subclinical) meningitis in one of premature  
1055 triplets with simultaneous enteroviral meningitis: a case report. *AJP Rep.*  
1056 2012;2(1):15-18.
- 1057 91. Matsuda S, Yoshida S, Takeuchi T, Fujiki Y, Yoshikawa A, Makino S.  
1058 Asymptomatic rheumatoid meningitis revealed by magnetic resonance imaging,  
1059 followed by systemic rheumatic vasculitis: A case report and a review of the  
1060 literature. *Mod Rheumatol.* 2019;29(2):370-376.
- 1061 92. Liss HP, Rimland D. Asymptomatic cryptococcal meningitis. *Am Rev Respir Dis.*  
1062 1981;124(1):88-89.
- 1063 93. Minhas V, Aprianto R, McAllister LJ, et al. In vivo dual RNA-seq reveals that  
1064 neutrophil recruitment underlies differential tissue tropism of *Streptococcus*  
1065 *pneumoniae*. *Commun Biol.* 2020;3(1):293.
- 1066 94. Christy AL, Walker ME, Hessner MJ, Brown MA. Mast cell activation and neutrophil  
1067 recruitment promotes early and robust inflammation in the meninges in EAE. *J*  
1068 *Autoimmun.* 2013;42:50-61.
- 1069 95. Walker-Caulfield ME, Hatfield JK, Brown MA. Dynamic changes in meningeal  
1070 inflammation correspond to clinical exacerbations in a murine model of relapsing-  
1071 remitting multiple sclerosis. *J Neuroimmunol.* 2015;278:112-122.
- 1072 96. Markowitz SK, Saito K, Moskowitz M. Neurogenically mediated leakage of plasma  
1073 protein occurs from blood vessels in dura mater but not brain. *J Neurosci.*  
1074 1988;7:4129-4136.
- 1075 97. Zenker W, Kubik S. Brain cooling in humans--anatomical considerations. *Anat*  
1076 *Embryol (Berl).* 1996;193(1):1-13.
- 1077 98. Pulous FE, Cruz-Hernández JC, Yang C, et al. Cerebrospinal fluid outflow through  
1078 skull channels instructs cranial hematopoiesis. *bioRxiv.* 2021:2021.2008.2027.457954.
- 1079 99. O'Brien CA, Overall C, Konradt C, et al. CD11c-Expressing Cells Affect Regulatory  
1080 T Cell Behavior in the Meninges during Central Nervous System Infection. *J*  
1081 *Immunol.* 2017;198(10):4054-4061.
- 1082 100. Lowther DE, Hafler DA. Regulatory T cells in the central nervous system. *Immunol*  
1083 *Rev.* 2012;248(1):156-169.
- 1084 101. Balin BJ, Broadwell RD, Salzman M, el-Kalliny M. Avenues for entry of peripherally  
1085 administered protein to the central nervous system in mouse, rat, and squirrel monkey.  
1086 *J Comp Neurol.* 1986;251(2):260-280.

- 1087 102. Broadwell RD, Balin BJ. Endocytic and exocytic pathways of the neuronal secretory  
1088 process and trans-synaptic transfer of wheat germ agglutinin-horseradish peroxidase  
1089 in vivo. *J Comp Neurol.* 1985;242(4):632-650.
- 1090 103. Li H, Su L, Zhang T, He F, Yin Y. MRI reveals segmental distribution of enterovirus  
1091 lesions in the central nervous system: a probable clinical evidence of retrograde  
1092 axonal transport of EV-A71. *J Neurovirol.* 2019;25(3):354-362.
- 1093 104. Johnson RT. The pathogenesis of herpes virus encephalitis. I. Virus pathways to the  
1094 nervous system of suckling mice demonstrated by fluorescent antibody staining. *J Exp*  
1095 *Med.* 1964;119(2):343-356.
- 1096 105. van Riel D, Verdijk R, Kuiken T. The olfactory nerve: a shortcut for influenza and  
1097 other viral diseases into the central nervous system. *J Pathol.* 2015;235(2):277-287.
- 1098 106. Tomlinson AH, Esiri MM. Herpes simplex encephalitis. Immunohistological  
1099 demonstration of spread of virus via olfactory pathways in mice. *J Neurol Sci.*  
1100 1983;60(3):473-484.
- 1101 107. Faber WM. The nasal mucosa and the subarachnoid space. *Am J Anat.*  
1102 1937;62(1):121-148.
- 1103 108. Ibáñez CF. Structure-function relationships in the neurotrophin family. *J Neurobiol.*  
1104 1994;25(11):1349-1361.
- 1105 109. Jansson B, Björk E. Visualization of in vivo olfactory uptake and transfer using  
1106 fluorescein dextran. *J Drug Target.* 2002;10(5):379-386.
- 1107 110. Furukawa M, Shimoda H, Kajiwara T, Kato S, Yanagisawa S. Topographic study on  
1108 nerve-associated lymphatic vessels in the murine craniofacial region by  
1109 immunohistochemistry and electron microscopy. *Biomed Res.* 2008;29(6):289-296.
- 1110 111. Viancour TA, Kreiter NA. Vesicular fast axonal transport rates in young and old rat  
1111 axons. *Brain Res.* 1993;628(1-2):209-217.
- 1112 112. Yi J, Khobreakar NV, Dantas TJ, Zhou J, Vallee RB. Imaging of motor-dependent  
1113 transport in neuronal and nonneuronal cells at high spatial and temporal resolution.  
1114 *Methods Cell Biol.* 2016;131:453-465.
- 1115 113. Gasser HS. Olfactory nerve fibers. *J Gen Physiol.* 1956;39(4):473-496.
- 1116 114. Schnaar RL, Gerardy-Schahn R, Hildebrandt H. Sialic acids in the brain: gangliosides  
1117 and polysialic acid in nervous system development, stability, disease, and  
1118 regeneration. *Physiol Rev.* 2014;94(2):461-518.
- 1119 115. Widner H, Jönsson BA, Hallstadius L, Wingårdh K, Strand SE, Johansson BB.  
1120 Scintigraphic method to quantify the passage from brain parenchyma to the deep  
1121 cervical lymph nodes in rats. *Eur J Nucl Med.* 1987;13(9):456-461.
- 1122 116. Nagra G, Koh L, Zakharov A, Armstrong D, Johnston M. Quantification of  
1123 cerebrospinal fluid transport across the cribriform plate into lymphatics in rats. *Am J*  
1124 *Physiol Regul Integr Comp Physiol.* 2006;291(5):R1383-1389.
- 1125 117. Bradbury MW, Cserr HF, Westrop RJ. Drainage of cerebral interstitial fluid into deep  
1126 cervical lymph of the rabbit. *Am J Physiol.* 1981;240(4):F329-336.

- 1127 118. Bradbury MW, Westrop RJ. Factors influencing exit of substances from cerebrospinal  
1128 fluid into deep cervical lymph of the rabbit. *J Physiol.* 1983;339:519-534.
- 1129 119. Zwillinger H. Die lymphbahnen des oberen nasals-chnittes und deren beziehungen zu  
1130 den perimeningealen lymphraumen. *Arch Laryngol und Rhinol.* 1912;26:66-78.
- 1131 120. Walter BA, Valera VA, Takahashi S, Ushiki T. The olfactory route for cerebrospinal  
1132 fluid drainage into the peripheral lymphatic system. *Neuropathol Appl Neurobiol.*  
1133 2006;32(4):388-396.
- 1134 121. Schwalbe G. Die Arachnoidalraum ein Lymphraum und sein Zusammenhang mit den  
1135 Perichorioidalraum. [The arachnoidal space as a lymphatic space with connection to  
1136 the perichoroidal compartment.]. *Zbl Med Wiss.* 1869;7:465-467.
- 1137 122. Ma Q, Ineichen BV, Detmar M, Proulx ST. Outflow of cerebrospinal fluid is  
1138 predominantly through lymphatic vessels and is reduced in aged mice. *Nat Commun.*  
1139 2017;8(1):1434.
- 1140 123. Absinta M, Ha SK, Nair G, et al. Human and nonhuman primate meninges harbor  
1141 lymphatic vessels that can be visualized noninvasively by MRI. *eLife.* 2017;6.
- 1142 124. Sjölander H, Jonsson AB. Olfactory nerve--a novel invasion route of *Neisseria*  
1143 *meningitidis* to reach the meninges. *PLoS One.* 2010;5(11):e14034.
- 1144 125. Macedo-Ramos H, Campos FS, Carvalho LA, et al. Olfactory ensheathing cells as  
1145 putative host cells for *Streptococcus pneumoniae*: evidence of bacterial invasion via  
1146 mannose receptor-mediated endocytosis. *Neurosci Res.* 2011;69(4):308-313.
- 1147 126. Macedo-Ramos H, Ruiz-Mendoza S, Mariante RM, et al. *Streptococcus pneumoniae*  
1148 resists intracellular killing by olfactory ensheathing cells but not by microglia. *Sci*  
1149 *Rep.* 2016;6:36813-36813.
- 1150 127. Doucette JR. The glial cells in the nerve fiber layer of the rat olfactory bulb. *Anat Rec.*  
1151 1984;210(2):385-391.
- 1152 128. Herbert RP, Harris J, Chong KP, Chapman J, West AK, Chuah MI. Cytokines and  
1153 olfactory bulb microglia in response to bacterial challenge in the compromised  
1154 primary olfactory pathway. *J Neuroinflammation.* 2012;9:109.
- 1155 129. Erlich SS, McComb JG, Hyman S, Weiss MH. Ultrastructural morphology of the  
1156 olfactory pathway for cerebrospinal fluid drainage in the rabbit. *J Neurosurg.*  
1157 1986;64(3):466-473.
- 1158 130. Yoffey JM. Passage of fluid and other substances through the nasal mucosa. *J*  
1159 *Laryngol Otol.* 1958;72(5):377-384.
- 1160 131. Seki M. Über den Bau und die Durchlässigkeit der Siebbeinplatte. *Arch Histol Jap.*  
1161 1963;24.  
1162

Fig.1

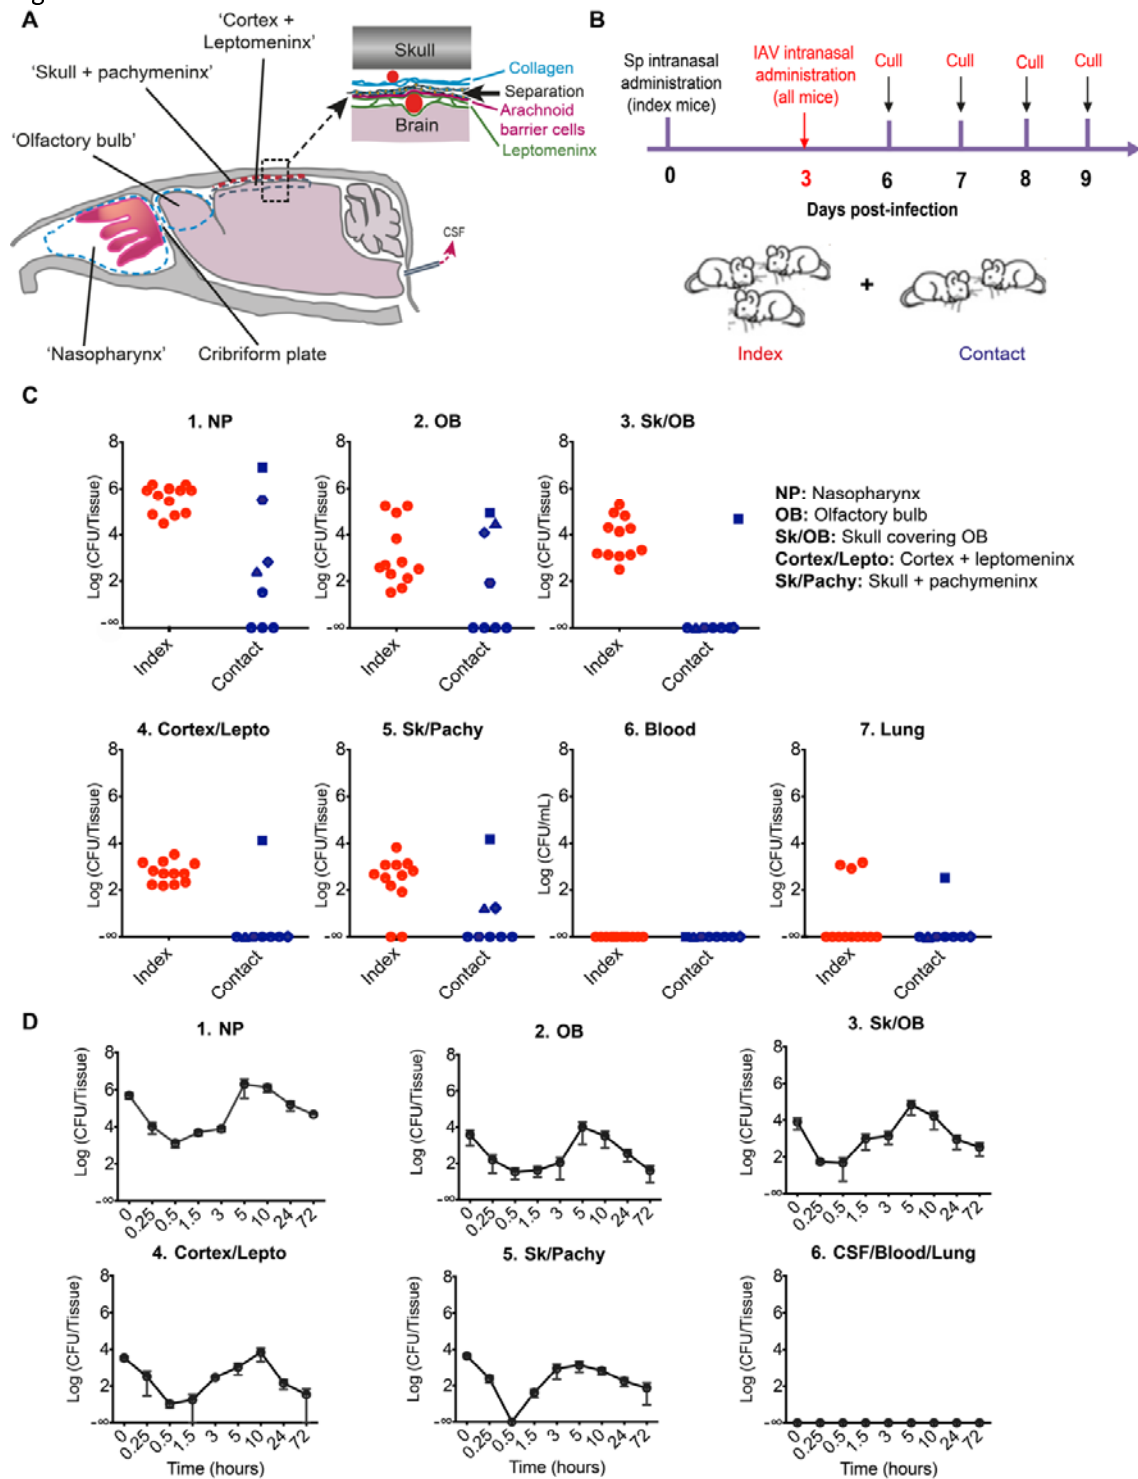

Fig. 2

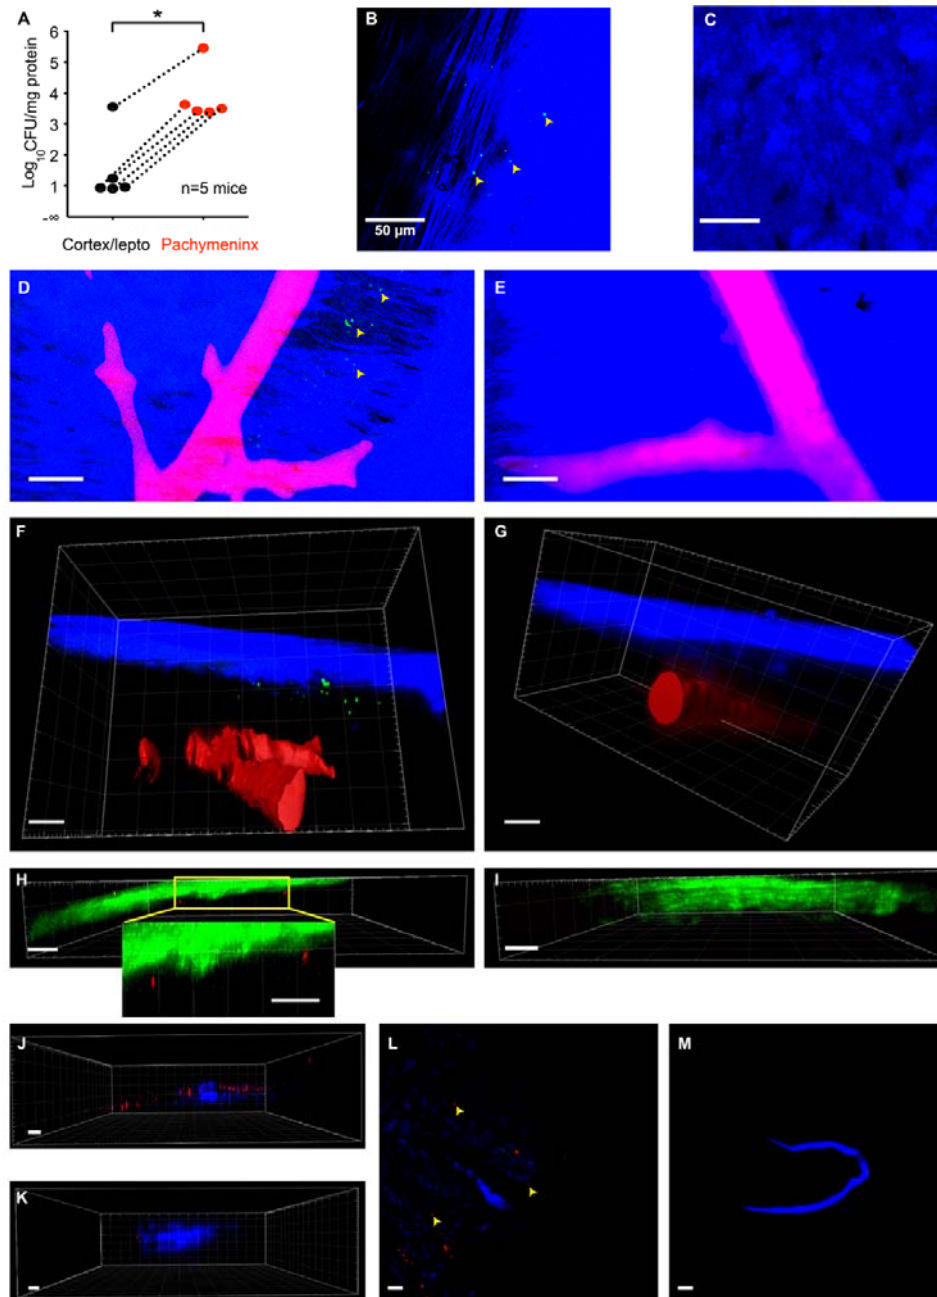



Fig.3

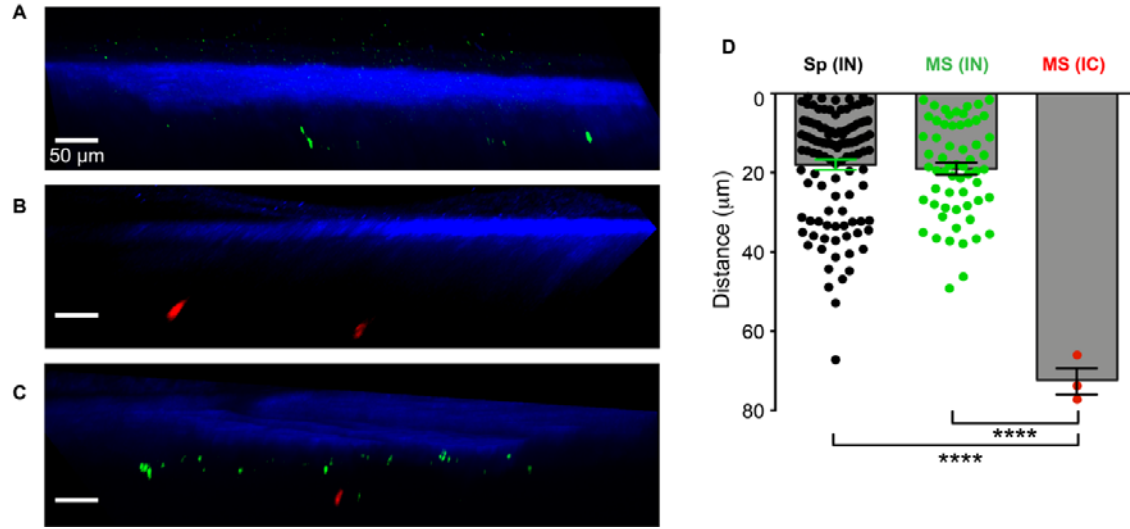

Fig.4

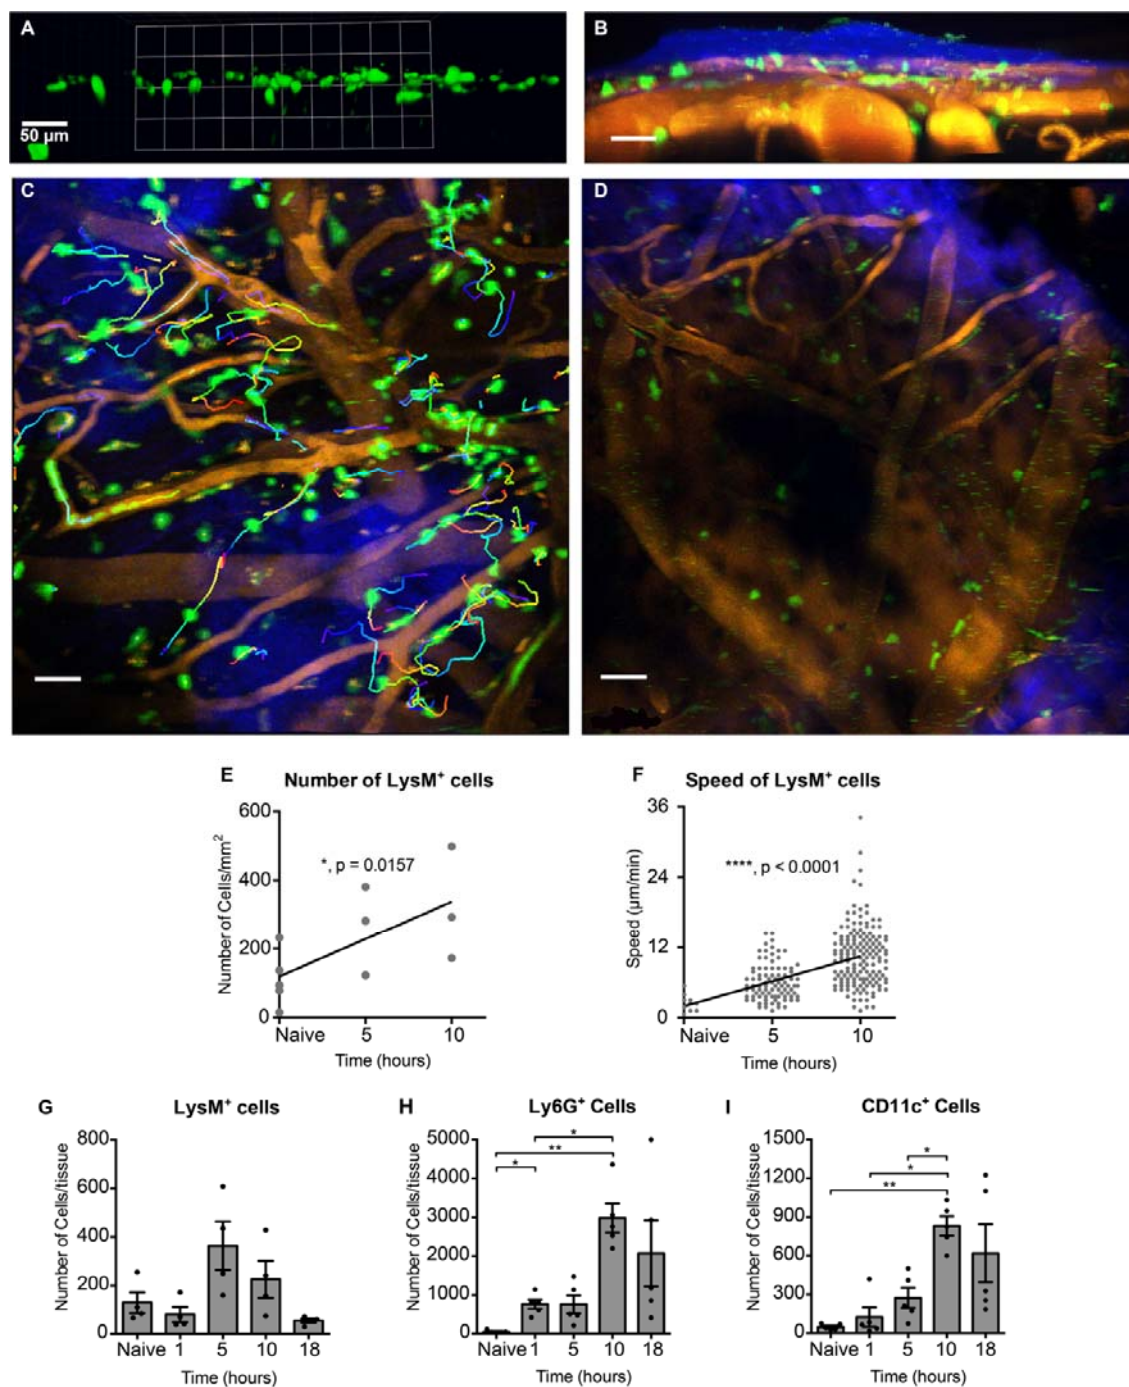



Fig. 5

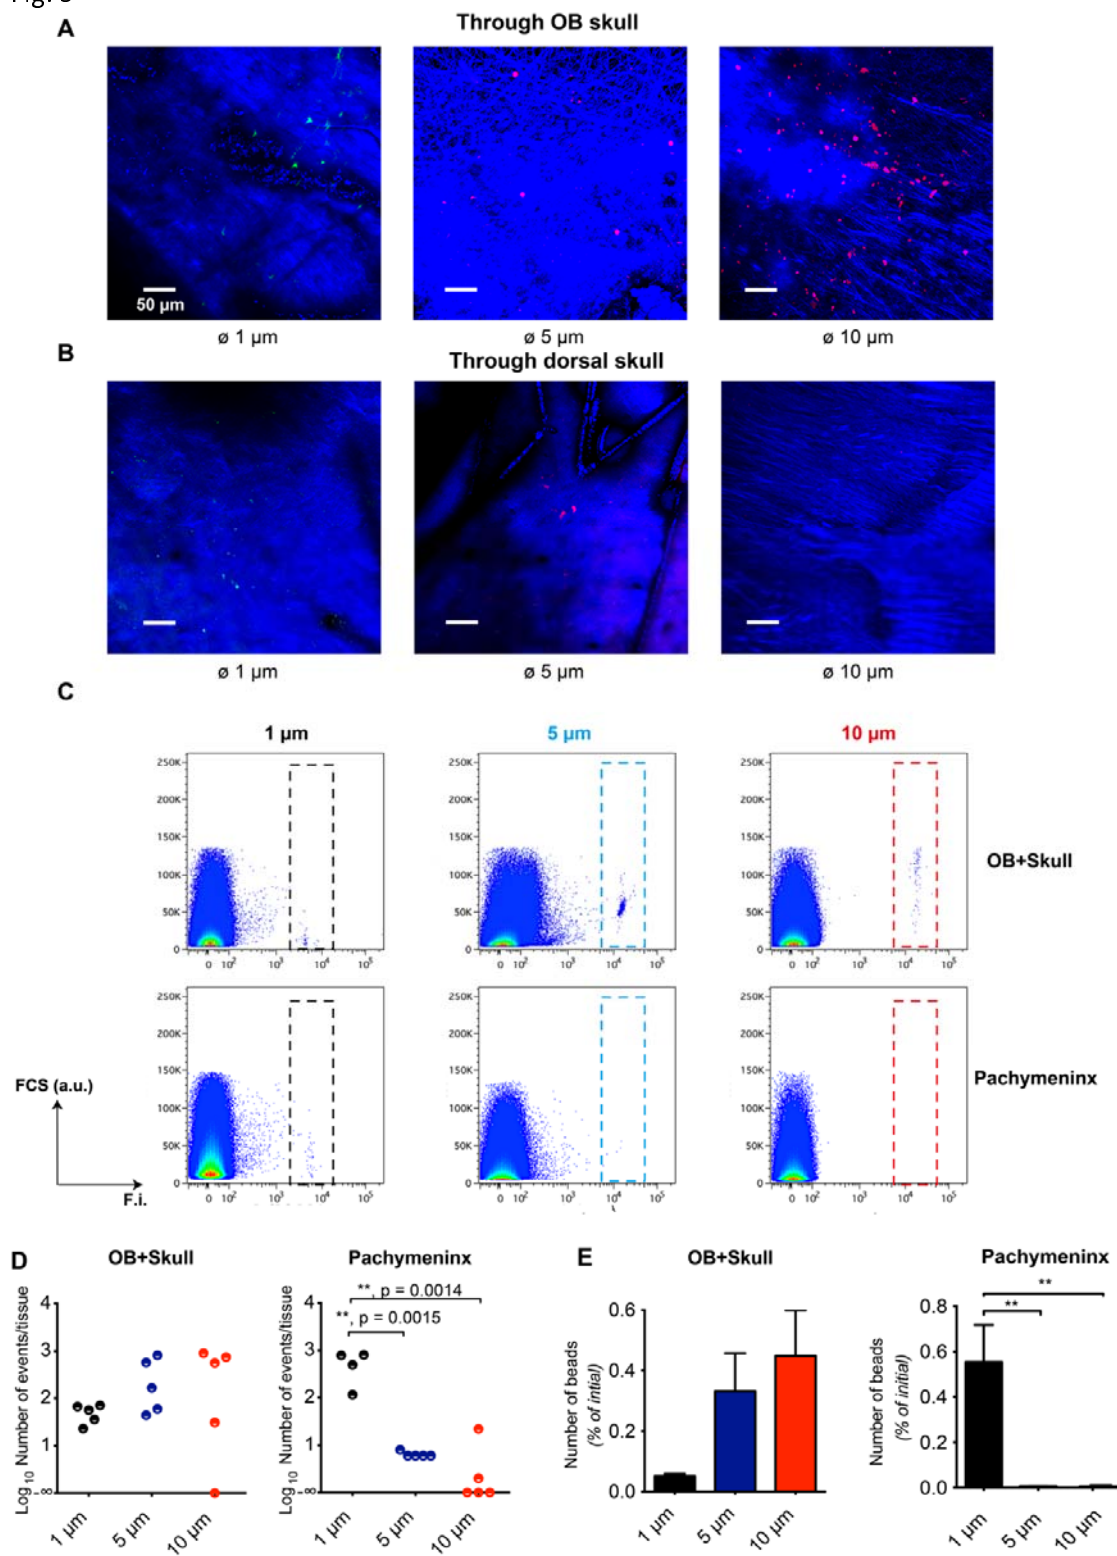

Source: http://biorxiv.org/content/10.1101/2021.09.28.462246v1.full.pdf
